# Supplementary material for: A new understanding towards the reactivity of DNA peroxy radicals
Source: Royal Society of Chemistry journal article supplement (doi:10.1039/c6cp04720c), 2016-01-01
Supplement: c6cp04720c1.pdf [file c6cp04720c1.pdf]

*Supporting Information*

**A new understanding towards reactivity of DNA peroxy  
radical**

**Shuang Zhao, Ru-bo Zhang \* and Ze-sheng Li**

## Content

- Fig. S1 The optimized models A - D using the M06-2X/6-31G(d,p) method.....S3
- Fig. S2 The optimized structures of all the stationery points and the transition states which relevant to the thymine C6-peroxyl radical reactions at the M06-2X/6-31+G(d,p)// M06-2X/6-31G(d,p) method.....S4
- Fig. S3 The regions diagram of the modified (dT)<sub>3</sub> model with ONIOM method, in which the reactive region is described by the Ball & Bond type and the remaining atoms are described by the wireframe as the low region.....S6
- Fig. S4 The single occupancy molecular orbitals (SOMOs) of the reactant and H1'-abstraction transition state. ....S7
- Table S1 The  $\langle S^2 \rangle$  values of each structures.....S8
- Table S2 The activation Gibbs free energies of H1' abstraction with different methods in the gas and in water solution.....S8
- The coordinates of all the stationery points and the transition states which relevant to the thymine C6-peroxyl radical reactions at the M06-2X/6-31+G(d,p)//M06-2X/6-31G(d,p) method in water solution.....S9

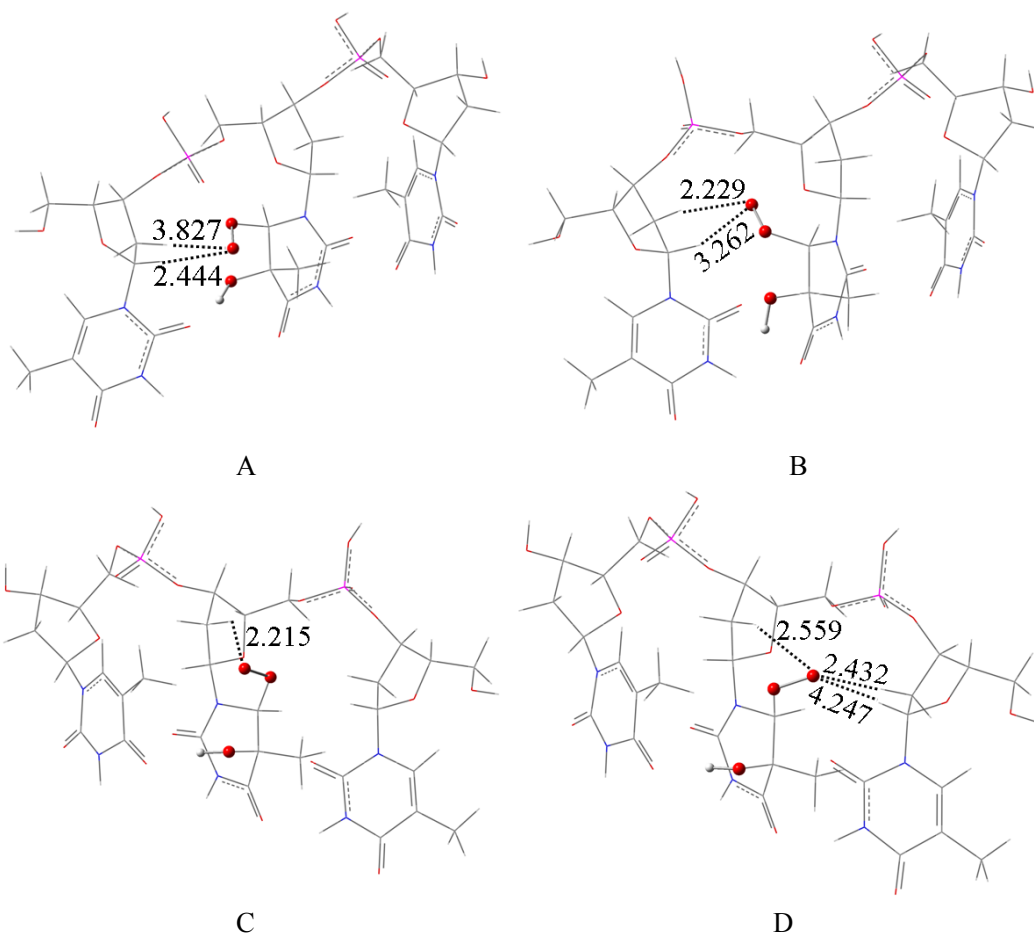

**Fig. S1** The optimized models A - D using the M06-2X/6-31G(d,p) method.

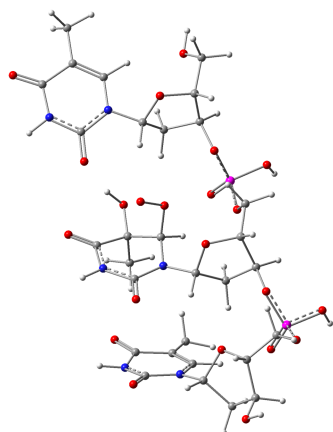

A

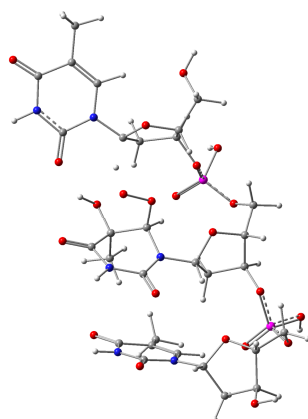

A-TS1

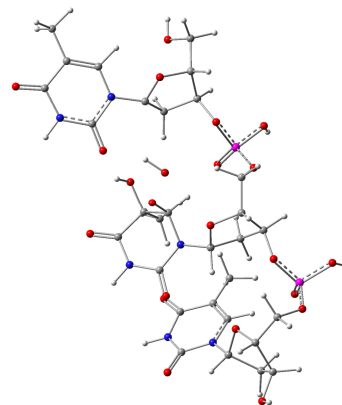

A-I1

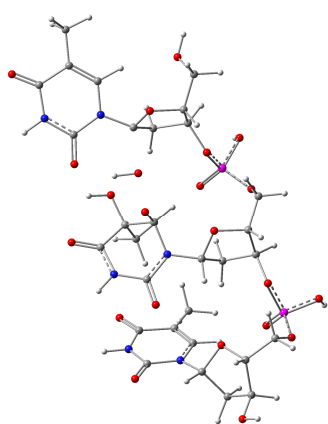

A-TS2

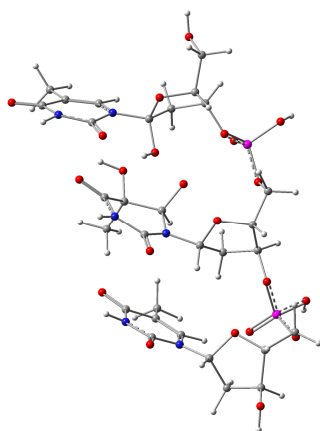

A-I2

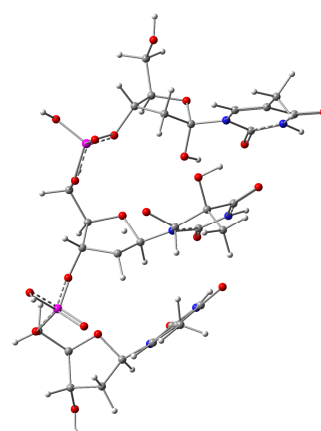

A-TS3

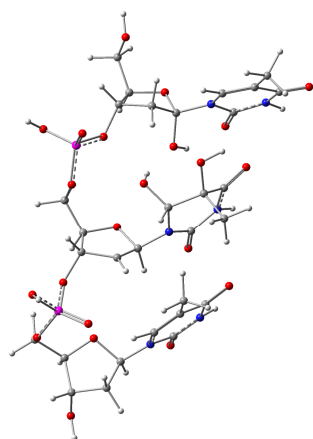

A-I3

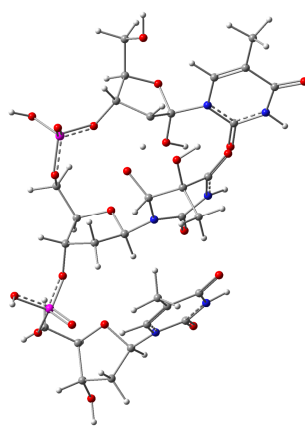

A-TS4

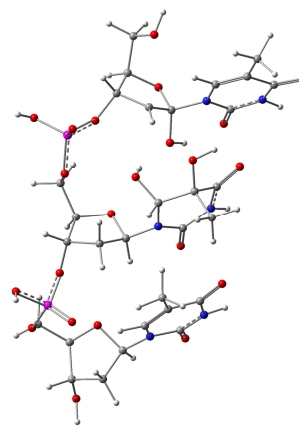

A-I4

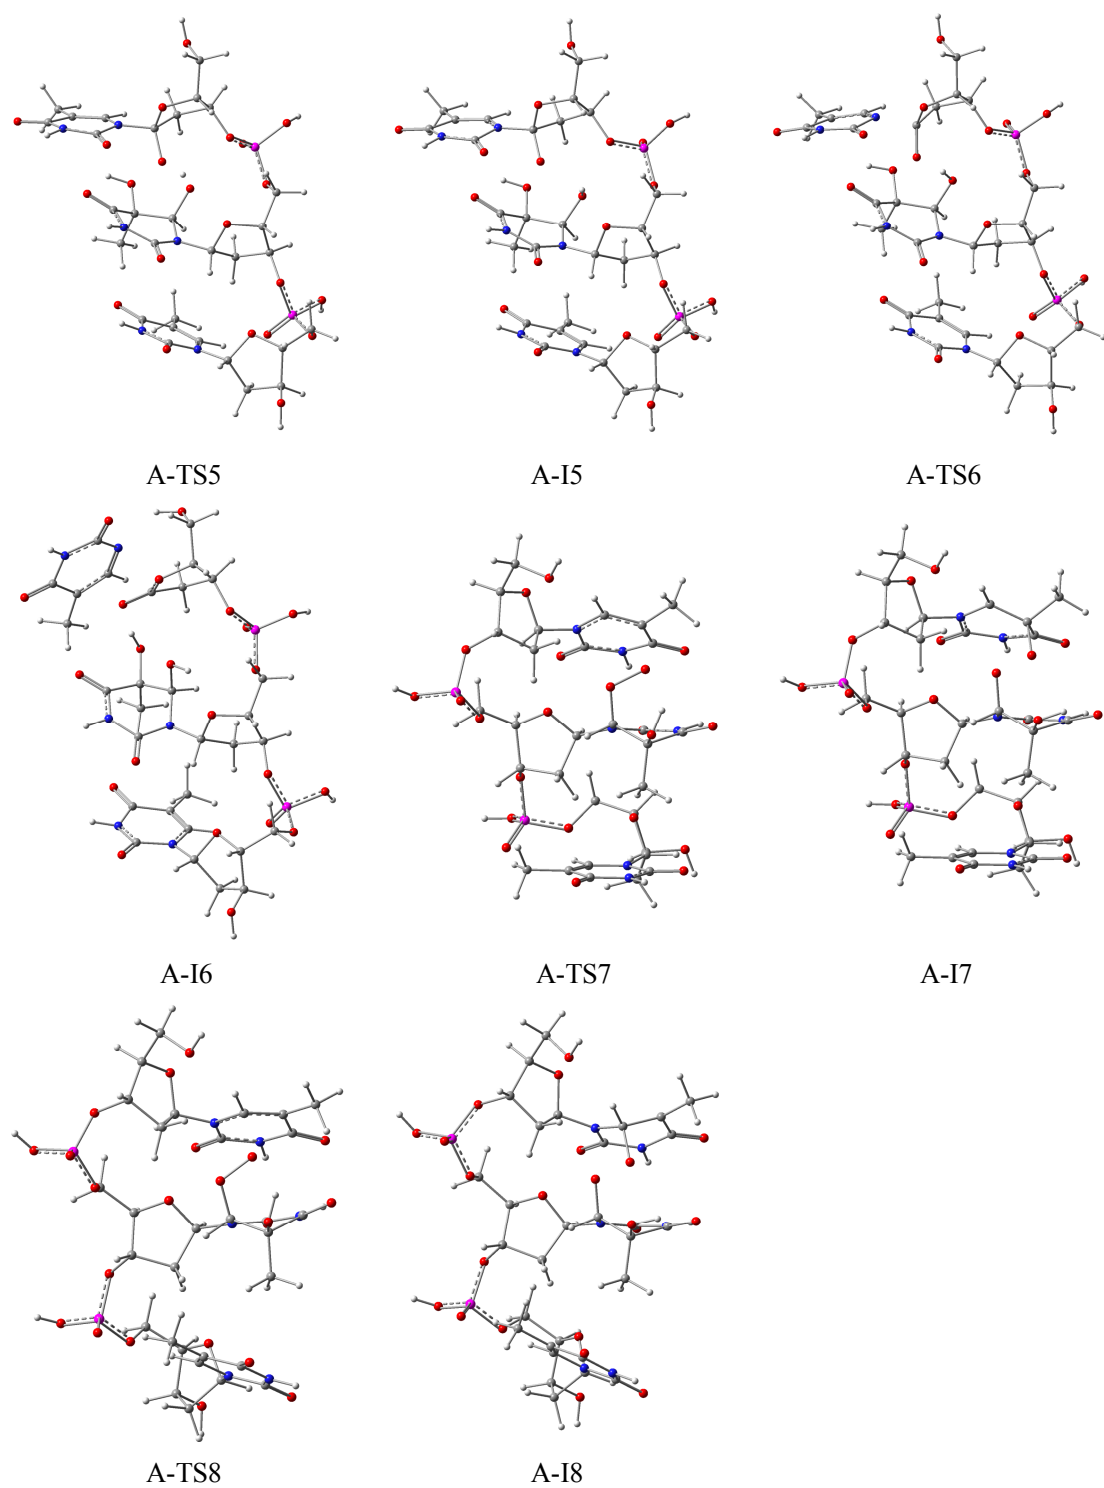

**Fig. S2** The optimized structures of all the stationary points and the transition states which relevant to the thymine C6-peroxyl radical reactions at the M06-2X/6-31+G(d,p)// M06-2X/6-31G(d,p) method.

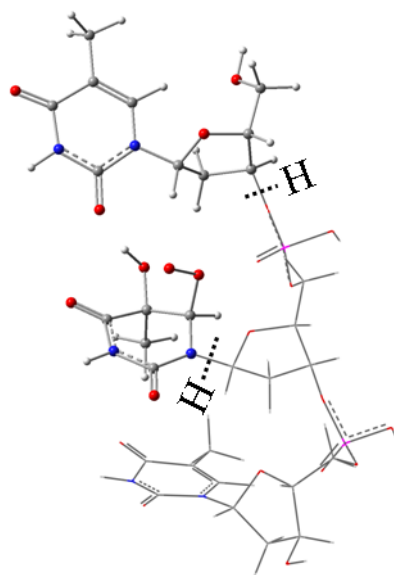

**Fig. S3** The regions diagram of the modified (dT)<sub>3</sub> model with ONIOM method, in which the reactive region is described by the Ball & Bond type and the remaining atoms are described by the wireframe as the low region.

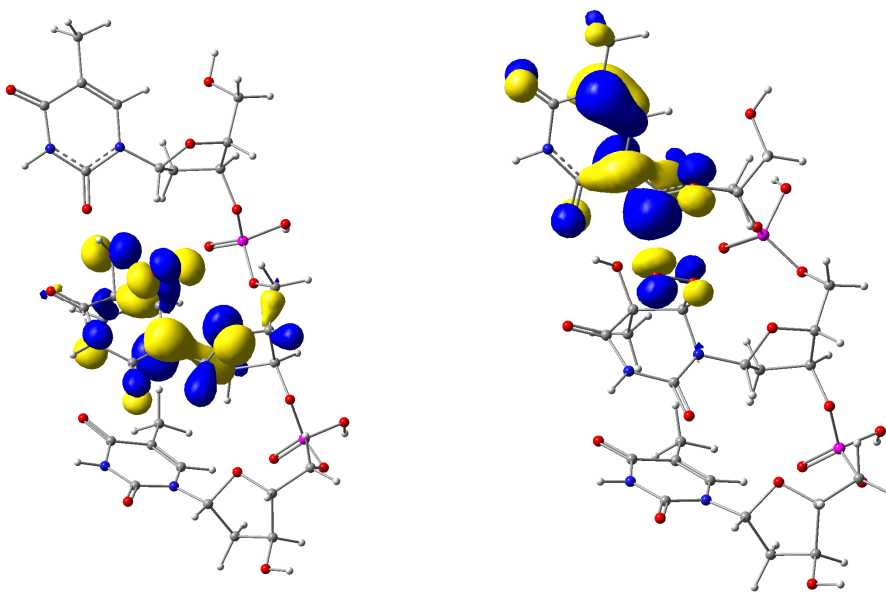

A

A-TS1

**Fig. S4** The single occupancy molecular orbitals (SOMOs) of the reactant and H1'-abstraction transition state.

**Table S1** The  $\langle S^2 \rangle$  values of each structures.

| structures | $\langle S^2 \rangle$ |
|------------|-----------------------|------------|-----------------------|------------|-----------------------|------------|-----------------------|
| A          | 0.7540                | A-TS3      | 0.7594                | A-TS5      | 0.7593                | A-TS7      | 0.7745                |
| A-TS1      | 0.7595                | A-I3       | 0.7550                | A-I5       | 0.7539                | A-I7       | 0.7561                |
| A-I1       | 0.7539                | A-TS4      | 0.7598                | A-TS6      | 0.7784                | A-TS8      | 0.7846                |
| A-TS2      | 0.7874                | A-I4       | 0.7549                | A-I6       | 0.7733                | A-I8       | 0.7596                |
| A-I2       | 0.7539                |            |                       |            |                       |            |                       |

**Table S2** The activation Gibbs free energies of H1' abstraction with different methods in the gas and in water solution.

| Methods                                      | $\Delta G^\ddagger$ (kcal/mol) |                   |
|----------------------------------------------|--------------------------------|-------------------|
|                                              | In the gas                     | In water solution |
| M06-2X/6-31+G(d,p)                           | 22.6                           | 21.0              |
| B3LYP/6-31+G(d,p)                            | 20.9                           | 19.2              |
| B3LYP/DZP++                                  | 20.0                           | 18.3              |
| ONIOM(MP2/6-31+G(d, p):M06-2X/6-31+G(d,p))   | 23.2                           | 21.2              |
| ONIOM(MP2/6-311++G(d, p):M06-2X/6-31+G(d,p)) | 23.1                           | 21.0              |



**The coordinates of all the stationary points and the transition states which relevant to the thymine C6-peroxyl radical reactions at the M06-2X/6-31+G(d,p)//M06-2X/6-31G(d,p) method in water solution.**

A:

0, 0, -7. 03393, -3. 01  
462, 0. 143116\C, 0, -6. 253469, -3. 60339, -0. 8819\H, 0, -5. 998737, -4. 645199, -0  
. 640372\C, 0, -4. 972071, -2. 803278, -1. 015245\H, 0, -4. 291336, -3. 333004, -1. 6  
92401\O, 0, -5. 263121, -1. 521017, -1. 551055\C, 0, -4. 831371, -0. 491254, -0. 675  
025\H, 0, -3. 902281, -0. 041753, -1. 034223\N, 0, -5. 84405, 0. 562143, -0. 702338\  
C, 0, -7. 184122, 0. 223279, -0. 633805\H, 0, -7. 363686, -0. 843343, -0. 532641\C, 0  
, -8. 178776, 1. 127845, -0. 693949\C, 0, -9. 634332, 0. 785321, -0. 623748\H, 0, -9.  
776824, -0. 291218, -0. 508658\H, 0, -10. 109395, 1. 29836, 0. 21694\H, 0, -10. 1506  
63, 1. 117062, -1. 528847\C, 0, -7. 830573, 2. 541766, -0. 843353\O, 0, -8. 625701, 3  
. 456115, -0. 917654\N, 0, -6. 451948, 2. 786057, -0. 889205\H, 0, -6. 160251, 3. 754  
307, -0. 95381\C, 0, -5. 427964, 1. 873517, -0. 804912\O, 0, -4. 252288, 2. 210486, -  
0. 813565\C, 0, -4. 266419, -2. 564056, 0. 327356\H, 0, -4. 537212, -3. 312437, 1. 07  
8613\C, 0, -4. 668565, -1. 146632, 0. 696316\H, 0, -5. 635115, -1. 17772, 1. 207065\  
H, 0, -3. 928545, -0. 636928, 1. 318467\O, 0, -2. 847195, -2. 639986, 0. 06256\P, 0, -  
1. 862705, -2. 750395, 1. 305725\O, 0, -1. 989808, -4. 314129, 1. 669738\O, 0, -2. 04  
0832, -1. 860116, 2. 461182\O, 0, -0. 44111, -2. 560972, 0. 626545\C, 0, -0. 090648,  
-2. 946121, -0. 706913\H, 0, 0. 008026, -4. 036569, -0. 75201\H, 0, -0. 859768, -2. 6  
0184, -1. 402655\C, 0, 1. 226957, -2. 261494, -1. 03292\H, 0, 1. 644613, -2. 718679,  
-1. 937866\O, 0, 1. 016955, -0. 884331, -1. 261762\C, 0, 1. 615332, -0. 081327, -0. 2  
4201\H, 0, 2. 492397, 0. 419007, -0. 657369\N, 0, 0. 692442, 0. 975508, 0. 144364\C,  
0, -0. 602892, 0. 622026, 0. 645362\C, 0, -1. 376531, 1. 804397, 1. 263132\C, 0, -0. 7  
8902, 2. 139332, 2. 635558\H, 0, 0. 244785, 2. 489307, 2. 563865\H, 0, -1. 401023, 2.  
93038, 3. 072894\H, 0, -0. 854199, 1. 251513, 3. 271948\C, 0, -1. 251598, 3. 056277,  
0. 40067\O, 0, -2. 098777, 3. 914082, 0. 366218\N, 0, -0. 047281, 3. 182107, -0. 2600  
82\H, 0, 0. 128371, 4. 057614, -0. 735821\C, 0, 0. 920276, 2. 215568, -0. 457563\O, 0  
, 1. 925077, 2. 472697, -1. 088807\C, 0, 2. 248353, -2. 342684, 0. 108622\H, 0, 2. 151  
275, -3. 249726, 0. 71308\C, 0, 2. 017857, -1. 046721, 0. 874507\H, 0, 1. 22114, -1. 1  
93499, 1. 604999\H, 0, 2. 920706, -0. 719162, 1. 386725\O, 0, 3. 546315, -2. 335846,  
-0. 523534\P, 0, 4. 869134, -2. 556522, 0. 331922\O, 0, 4. 716072, -4. 065491, 0. 853  
837\O, 0, 5. 162449, -1. 626006, 1. 441043\O, 0, 5. 966025, -2. 679903, -0. 807417\C  
, 0, 5. 884717, -2. 036015, -2. 086374\H, 0, 6. 566839, -2. 594959, -2. 731501\H, 0, 4  
. 867598, -2. 115905, -2. 477365\C, 0, 6. 309354, -0. 588408, -2. 01682\H, 0, 6. 4275  
17, -0. 214034, -3. 04662\O, 0, 5. 308405, 0. 162441, -1. 350194\C, 0, 5. 997371, 1. 2  
91278, -0. 805095\H, 0, 6. 292626, 1. 974115, -1. 607281\N, 0, 5. 108051, 2. 032778,  
0. 04952\C, 0, 4. 541801, 1. 424122, 1. 152995\H, 0, 4. 924447, 0. 4312, 1. 372995\C,  
0, 3. 567951, 1. 987787, 1. 892668\C, 0, 2. 945647, 1. 332015, 3. 087162\H, 0, 3. 5077  
4, 0. 439518, 3. 373592\H, 0, 2. 918303, 2. 024008, 3. 933171\H, 0, 1. 910215, 1. 0406  
35, 2. 878797\C, 0, 3. 069836, 3. 301176, 1. 489167\O, 0, 2. 099496, 3. 85874, 1. 9745  
34\N, 0, 3. 817475, 3. 915196, 0. 488346\H, 0, 3. 45721, 4. 797482, 0. 146234\C, 0, 4.

729746, 3. 315821, -0. 357666\0, 0, 5. 186253, 3. 874305, -1. 330524\C, 0, 7. 650126  
, -0. 318354, -1. 2638\H, 0, 8. 073119, -1. 245918, -0. 859696\C, 0, 7. 224848, 0. 649  
419, -0. 1619\H, 0, 6. 93436, 0. 096895, 0. 736134\H, 0, 8. 01944, 1. 361184, 0. 06448  
8\0, 0, 8. 579827, 0. 355721, -2. 088868\H, 0, 8. 883627, -0. 246233, -2. 777164\H, 0  
, -7. 86543, -3. 493767, 0. 220204\H, 0, -1. 850489, -4. 450729, 2. 616258\H, 0, 5. 03  
7378, -4. 141064, 1. 761718\H, 0, -6. 775089, -3. 583915, -1. 847422\0, 0, -1. 43477  
7, -0. 005456, -0. 381776\0, 0, -1. 634632, 0. 798553, -1. 387014\H, 0, -0. 53226, -0  
. 175222, 1. 387372\0, 0, -2. 71767, 1. 453513, 1. 417493\H, 0, -3. 225852, 1. 849955  
, 0. 683378\\Version=EM64L-G09RevA. 01\State=2-A\HF=-3833. 1552239\S2=0. 75  
4744\S2-1=0. \S2A=0. 750014\RMSD=4. 678e-09\Dipole=1. 116473, -8. 8557926, 0.  
4885116\Quadrupole=15. 6983087, -6. 1924178, -9. 5058909, 24. 2434708, -5. 3356  
147, 5. 3109053\PG=C01 [X(C30H41N6O22P2)]\@\

#### A-TS1:

0, 0, 5. 707476, 3. 251  
142, -1. 596859\C, 0, 4. 465201, 3. 103427, -2. 259756\H, 0, 3. 864624, 4. 023006, -2  
. 207538\C, 0, 3. 716151, 1. 995579, -1. 551346\H, 0, 2. 711282, 1. 861671, -1. 96869  
2\0, 0, 4. 469248, 0. 802709, -1. 724941\C, 0, 4. 487637, 0. 042079, -0. 578595\H, 0,  
3. 511514, -0. 836255, -0. 734781\N, 0, 5. 750773, -0. 654458, -0. 518732\C, 0, 6. 90  
9365, 0. 038458, -0. 855939\H, 0, 6. 733805, 1. 070618, -1. 14794\C, 0, 8. 133075, -0  
. 517389, -0. 835266\C, 0, 9. 394411, 0. 20762, -1. 187999\H, 0, 9. 186441, 1. 244194  
, -1. 460069\H, 0, 10. 091692, 0. 192834, -0. 345848\H, 0, 9. 897271, -0. 286565, -2.  
023729\C, 0, 8. 256476, -1. 924578, -0. 445955\0, 0, 9. 297235, -2. 545643, -0. 3896  
48\N, 0, 7. 039101, -2. 536542, -0. 123927\H, 0, 7. 079024, -3. 510301, 0. 152919\C,  
0, 5. 778225, -1. 985846, -0. 131721\0, 0, 4. 78762, -2. 624545, 0. 1718\C, 0, 3. 5908  
34, 2. 224051, -0. 032668\H, 0, 4. 167387, 3. 098552, 0. 27965\C, 0, 4. 128928, 0. 940  
331, 0. 609473\H, 0, 5. 043998, 1. 149044, 1. 173445\H, 0, 3. 411861, 0. 464336, 1. 28  
3457\0, 0, 2. 204342, 2. 503265, 0. 216503\P, 0, 1. 652481, 2. 890708, 1. 652428\0, 0  
, 2. 568119, 4. 150968, 2. 049039\0, 0, 1. 604047, 1. 856842, 2. 698532\0, 0, 0. 21716  
8, 3. 475459, 1. 292703\C, 0, -0. 255748, 3. 805557, -0. 017494\H, 0, -0. 733879, 4. 7  
85936, 0. 058093\H, 0, 0. 572435, 3. 851837, -0. 727117\C, 0, -1. 263631, 2. 766763,  
-0. 466496\H, 0, -1. 761402, 3. 138178, -1. 373415\0, 0, -0. 603488, 1. 542875, -0. 7  
30544\C, 0, -1. 375743, 0. 475281, -0. 163412\H, 0, -2. 191618, 0. 180941, -0. 83282  
2\N, 0, -0. 535915, -0. 680261, 0. 015237\C, 0, 0. 813188, -0. 493159, 0. 492989\C, 0  
, 1. 296583, -1. 731551, 1. 25931\C, 0, 0. 468403, -1. 88767, 2. 536761\H, 0, -0. 5862  
73, -2. 062115, 2. 324269\H, 0, 0. 853215, -2. 747665, 3. 08766\H, 0, 0. 594474, -0. 9  
85486, 3. 143637\C, 0, 1. 089748, -2. 968033, 0. 393021\0, 0, 1. 813014, -3. 932278,  
0. 433116\N, 0, -0. 041545, -2. 924102, -0. 409991\H, 0, -0. 24478, -3. 748607, -0. 9  
60803\C, 0, -0. 881654, -1. 841944, -0. 651061\0, 0, -1. 857056, -1. 954918, -1. 365  
578\C, 0, -2. 343122, 2. 461353, 0. 594708\H, 0, -2. 436123, 3. 242951, 1. 3541\C, 0,  
-1. 927048, 1. 097445, 1. 11836\H, 0, -1. 129131, 1. 215492, 1. 861146\H, 0, -2. 7599  
42, 0. 540096, 1. 547788\0, 0, -3. 5808, 2. 359406, -0. 141737\P, 0, -4. 991816, 2. 29  
905, 0. 586464\0, 0, -5. 15065, 3. 779275, 1. 185303\0, 0, -5. 21537, 1. 26788, 1. 618

409\0, 0, -5. 981272, 2. 280089, -0. 655718\C, 0, -5. 604589, 1. 95187, -2. 000075\H  
, 0, -6. 288794, 2. 512686, -2. 642343\H, 0, -4. 580179, 2. 276045, -2. 19258\C, 0, -5  
. 754846, 0. 471473, -2. 260612\H, 0, -5. 596891, 0. 292721, -3. 336395\0, 0, -4. 784  
777, -0. 240037, -1. 509054\C, 0, -5. 363923, -1. 523109, -1. 249718\H, 0, -5. 35798  
9, -2. 136454, -2. 154999\N, 0, -4. 574473, -2. 22598, -0. 272475\C, 0, -4. 306979, -  
1. 629636, 0. 93988\H, 0, -4. 798896, -0. 675511, 1. 104433\C, 0, -3. 496306, -2. 159  
979, 1. 876926\C, 0, -3. 276477, -1. 520369, 3. 21556\H, 0, -3. 919021, -0. 642164, 3  
. 321998\H, 0, -3. 503815, -2. 228979, 4. 016835\H, 0, -2. 236199, -1. 209627, 3. 353  
599\C, 0, -2. 850615, -3. 439226, 1. 58802\0, 0, -2. 061977, -4. 011886, 2. 318344\N  
, 0, -3. 223819, -4. 000457, 0. 364554\H, 0, -2. 809142, -4. 89499, 0. 135348\C, 0, -4  
. 020768, -3. 457378, -0. 625857\0, 0, -4. 246129, -4. 025196, -1. 671401\C, 0, -7. 1  
47653, -0. 118636, -1. 882171\H, 0, -7. 81421, 0. 657924, -1. 486769\C, 0, -6. 78798  
4, -1. 161359, -0. 831903\H, 0, -6. 772495, -0. 706414, 0. 163845\H, 0, -7. 476588, -  
2. 00667, -0. 852985\0, 0, -7. 73648, -0. 7968, -2. 974386\H, 0, -7. 985832, -0. 1521  
34, -3. 645524\H, 0, 6. 231054, 3. 917482, -2. 053004\H, 0, 2. 768832, 4. 138502, 2. 9  
94326\H, 0, -5. 548963, 3. 745139, 2. 064865\H, 0, 4. 59953, 2. 829265, -3. 313528\0  
, 0, 1. 665276, -0. 103502, -0. 594106\0, 0, 2. 393805, -1. 16977, -1. 096101\H, 0, 0.  
82547, 0. 358758, 1. 173607\0, 0, 2. 637042, -1. 585733, 1. 617166\H, 0, 3. 18143, -2  
. 217413, 1. 111298\\Version=EM64L-G09RevA. 01\State=2-A\HF=-3833. 1146775\  
S2=0. 758964\S2-1=0. \S2A=0. 750039\RMSD=1. 759e-09\Dipole=-1. 148049, 9. 032  
1834, -1. 4724306\Quadrupole=8. 6994829, -5. 3851187, -3. 3143642, 17. 5084408,  
-4. 0915367, -9. 776984\PG=C01 [X(C30H41N6O22P2)]\ \@

#### A-II:

0, 0, -7. 014787, -2. 3  
24426, 1. 371211\C, 0, -6. 560596, -3. 400366, 0. 572823\H, 0, -6. 306239, -4. 28130  
3, 1. 178678\C, 0, -5. 314383, -2. 927345, -0. 14762\H, 0, -4. 905255, -3. 733348, -0  
. 762809\0, 0, -5. 675861, -1. 840491, -1. 006709\C, 0, -5. 115534, -0. 68066, -0. 56  
0812\H, 0, -2. 928374, 0. 277638, -1. 419036\N, 0, -5. 94604, 0. 444754, -0. 819789\  
C, 0, -7. 326004, 0. 361924, -0. 654684\H, 0, -7. 662086, -0. 608962, -0. 307281\C, 0  
, -8. 156881, 1. 392266, -0. 88888\C, 0, -9. 643467, 1. 333573, -0. 724263\H, 0, -9. 9  
62659, 0. 344953, -0. 38925\H, 0, -9. 97693, 2. 081314, 0. 00031\H, 0, -10. 140447, 1  
. 565577, -1. 67015\C, 0, -7. 585063, 2. 669636, -1. 322679\0, 0, -8. 218052, 3. 6729  
4, -1. 570453\N, 0, -6. 185259, 2. 662493, -1. 432919\H, 0, -5. 747773, 3. 530921, -1  
. 719787\C, 0, -5. 332159, 1. 61571, -1. 216041\0, 0, -4. 118359, 1. 715144, -1. 3652  
19\C, 0, -4. 234408, -2. 379406, 0. 7964\H, 0, -4. 328991, -2. 805229, 1. 800246\C, 0  
, -4. 440748, -0. 867701, 0. 768815\H, 0, -5. 126128, -0. 578234, 1. 575718\H, 0, -3.  
509503, -0. 303111, 0. 879036\0, 0, -2. 964775, -2. 761426, 0. 235003\P, 0, -1. 7061  
05, -2. 751599, 1. 21658\0, 0, -1. 964986, -4. 027797, 2. 15516\0, 0, -1. 478793, -1.  
525963, 2. 006001\0, 0, -0. 536726, -3. 245681, 0. 277101\C, 0, -0. 360063, -2. 9335  
38, -1. 123737\H, 0, -0. 400554, -3. 89552, -1. 639451\H, 0, -1. 156126, -2. 274082,  
-1. 478882\C, 0, 0. 988223, -2. 251464, -1. 367585\H, 0, 1. 40215, -2. 635736, -2. 30  
7326\0, 0, 0. 826491, -0. 849964, -1. 48278\C, 0, 1. 584325, -0. 16253, -0. 484547\H

, 0, 2. 538488, 0. 183325, -0. 89403\N, 0, 0. 848262, 1. 013583, -0. 06963\C, 0, -0. 58  
0789, 0. 885042, 0. 095301\C, 0, -1. 155656, 1. 996247, 0. 980904\C, 0, -0. 663628, 1  
. 885763, 2. 418955\H, 0, 0. 399095, 2. 121656, 2. 50348\H, 0, -1. 224834, 2. 598792,  
3. 026135\H, 0, -0. 859099, 0. 870629, 2. 777809\C, 0, -0. 72583, 3. 341323, 0. 39644  
2\0, 0, -1. 407514, 4. 337207, 0. 404575\N, 0, 0. 556506, 3. 337648, -0. 137719\H, 0,  
0. 912895, 4. 222703, -0. 476127\C, 0, 1. 37388, 2. 244718, -0. 419279\0, 0, 2. 47359  
3, 2. 409068, -0. 908177\C, 0, 2. 007448, -2. 457201, -0. 238054\H, 0, 1. 895174, -3.  
407503, 0. 288682\C, 0, 1. 801316, -1. 210041, 0. 606231\H, 0, 0. 902198, -1. 320528  
, 1. 222579\H, 0, 2. 658644, -0. 990096, 1. 239763\0, 0, 3. 301775, -2. 413891, -0. 88  
0559\P, 0, 4. 638778, -2. 726195, -0. 081292\0, 0, 4. 572949, -4. 311523, 0. 152333\  
0, 0, 4. 892609, -2. 003227, 1. 181399\0, 0, 5. 72561, -2. 575098, -1. 228089\C, 0, 5.  
579906, -1. 740113, -2. 386151\H, 0, 6. 204361, -2. 203013, -3. 15451\H, 0, 4. 53892  
6, -1. 738459, -2. 716522\C, 0, 6. 054119, -0. 329873, -2. 122828\H, 0, 6. 134597, 0.  
190631, -3. 090933\0, 0, 5. 113048, 0. 340703, -1. 300592\C, 0, 5. 868363, 1. 316111  
, -0. 57641\H, 0, 6. 167643, 2. 133634, -1. 2386\N, 0, 5. 048217, 1. 904023, 0. 449812  
\C, 0, 4. 434346, 1. 094862, 1. 38287\H, 0, 4. 733139, 0. 050739, 1. 349932\C, 0, 3. 52  
6177, 1. 537903, 2. 274298\C, 0, 2. 877907, 0. 661576, 3. 303008\H, 0, 3. 38615, -0. 3  
04696, 3. 358406\H, 0, 2. 912198, 1. 141879, 4. 284398\H, 0, 1. 82238, 0. 486234, 3. 0  
67136\C, 0, 3. 162824, 2. 953104, 2. 247845\0, 0, 2. 319141, 3. 475228, 2. 956581\N,  
0, 3. 891342, 3. 712111, 1. 33425\H, 0, 3. 657041, 4. 695047, 1. 277596\C, 0, 4. 76544  
, 3. 268187, 0. 360459\0, 0, 5. 269966, 4. 012272, -0. 451442\C, 0, 7. 436652, -0. 221  
661, -1. 407867\H, 0, 7. 868468, -1. 212423, -1. 221761\C, 0, 7. 081508, 0. 51002, -0  
. 118124\H, 0, 6. 778328, -0. 205598, 0. 652497\H, 0, 7. 910402, 1. 125951, 0. 231991  
\0, 0, 8. 33153, 0. 602832, -2. 129047\H, 0, 8. 567964, 0. 162989, -2. 953\H, 0, -7. 78  
9475, -2. 603888, 1. 870095\H, 0, -1. 72397, -3. 820142, 3. 067677\H, 0, 4. 893, -4. 5  
30645, 1. 036859\H, 0, -7. 310158, -3. 69335, -0. 174093\0, 0, -1. 216115, 0. 963117  
, -1. 177986\0, 0, -2. 0651, -0. 172594, -1. 321832\H, 0, -0. 816538, -0. 077535, 0. 5  
47265\0, 0, -2. 551198, 1. 889004, 0. 995456\H, 0, -2. 888328, 2. 123584, 0. 115695\  
\Version=EM64L-G09RevA. 01\State=2-A\HF=-3833. 1439867\S2=0. 754272\S2-1=  
0. \S2A=0. 750014\RMSD=3. 297e-09\Dipole=-1. 8442358, -8. 5598776, 0. 4626263\  
Quadrupole=37. 0060117, -26. 0362826, -10. 9697291, 21. 4791039, -26. 4321617, -  
5. 6665479\PG=C01 [X(C30H41N6O22P2)]\ \@

#### A-TS2:

0, 0, 6. 498546, 3. 19304, -0. 266963\C, 0, 5.  
574596, 3. 53963, -1. 284301\H, 0, 5. 154153, 4. 542071, -1. 123896\C, 0, 4. 456432,  
2. 520452, -1. 216758\H, 0, 3. 65232, 2. 764383, -1. 918281\0, 0, 5. 014493, 1. 25794  
9, -1. 569243\C, 0, 4. 702328, 0. 317213, -0. 638566\H, 0, 3. 250979, -1. 230567, -1.  
216712\N, 0, 5. 751968, -0. 674236, -0. 603529\C, 0, 7. 049077, -0. 189059, -0. 4178  
07\H, 0, 7. 103279, 0. 894905, -0. 35581\C, 0, 8. 135729, -0. 973617, -0. 331379\C, 0  
, 9. 529343, -0. 466046, -0. 128972\H, 0, 9. 542207, 0. 622825, -0. 052052\H, 0, 9. 96  
1508, -0. 892544, 0. 780268\H, 0, 10. 171088, -0. 772221, -0. 959537\C, 0, 7. 959481  
, -2. 422467, -0. 447544\0, 0, 8. 84749, -3. 245598, -0. 385812\N, 0, 6. 630177, -2. 8

15219, -0.649766\H, 0, 6.46206, -3.809002, -0.75541\C, 0, 5.509448, -2.028182,  
-0.749917\O, 0, 4.407837, -2.521254, -0.953687\C, 0, 3.880617, 2.377734, 0.205  
972\H, 0, 4.274012, 3.155545, 0.864319\C, 0, 4.310116, 0.981087, 0.656745\H, 0,  
5.189059, 1.068003, 1.308064\H, 0, 3.525393, 0.422018, 1.173607\O, 0, 2.455875  
, 2.555305, 0.111494\P, 0, 1.597438, 2.785788, 1.434265\O, 0, 2.400838, 3.94668  
1, 2.202317\O, 0, 1.336382, 1.621999, 2.298298\O, 0, 0.305455, 3.517715, 0.8790  
56\C, 0, -0.083568, 3.708797, -0.487932\H, 0, -0.457563, 4.733561, -0.552624\H  
, 0, 0.774272, 3.580814, -1.15122\C, 0, -1.173885, 2.725821, -0.862581\H, 0, -1.  
682619, 3.095794, -1.763575\O, 0, -0.597037, 1.457491, -1.111307\C, 0, -1.4045  
79, 0.462396, -0.480603\H, 0, -2.267429, 0.195823, -1.101471\N, 0, -0.62581, -0  
.737454, -0.296555\C, 0, 0.809544, -0.658705, -0.076424\C, 0, 1.223253, -1.813  
731, 0.851348\C, 0, 0.505464, -1.717955, 2.198083\H, 0, -0.574543, -1.819962, 2  
.09012\H, 0, 0.861923, -2.520429, 2.846661\H, 0, 0.74452, -0.748688, 2.646842\  
C, 0, 0.833104, -3.102136, 0.139739\O, 0, 1.538097, -4.086662, 0.125927\N, 0, -0  
.402373, -3.060289, -0.47216\H, 0, -0.738888, -3.907253, -0.912514\C, 0, -1.17  
8949, -1.925431, -0.720515\O, 0, -2.270721, -2.030564, -1.243633\C, 0, -2.2218  
86, 2.522502, 0.254079\H, 0, -2.227403, 3.333079, 0.988157\C, 0, -1.859211, 1.1  
53397, 0.803603\H, 0, -1.014318, 1.234184, 1.498082\H, 0, -2.701322, 0.661651,  
1.290404\O, 0, -3.499886, 2.476042, -0.417586\P, 0, -4.867596, 2.507572, 0.392  
677\O, 0, -4.988163, 4.038679, 0.85514\O, 0, -5.034461, 1.583185, 1.53097\O, 0,  
-5.92402, 2.399033, -0.788317\C, 0, -5.652107, 1.829129, -2.076004\H, 0, -6.33  
4845, 2.33079, -2.767006\H, 0, -4.622075, 2.041321, -2.368952\C, 0, -5.914641,  
0.342083, -2.0911\H, 0, -5.844895, -0.008121, -3.13392\O, 0, -4.942456, -0.319  
667, -1.299613\C, 0, -5.57035, -1.531989, -0.872516\H, 0, -5.647045, -2.23724,  
-1.705253\N, 0, -4.764714, -2.170384, 0.134991\C, 0, -4.353055, -1.441366, 1.2  
28199\H, 0, -4.781179, -0.445477, 1.301995\C, 0, -3.480574, -1.896011, 2.14951  
9\C, 0, -3.095794, -1.105956, 3.364526\H, 0, -3.650673, -0.164361, 3.391641\H,  
0, -3.313529, -1.674773, 4.272973\H, 0, -2.024738, -0.88197, 3.379382\C, 0, -2.  
925038, -3.236624, 1.974821\O, 0, -2.109648, -3.763592, 2.709629\N, 0, -3.4237  
36, -3.917203, 0.86062\H, 0, -3.074507, -4.855931, 0.715141\C, 0, -4.290254, -3  
.458096, -0.113234\O, 0, -4.63063, -4.134744, -1.058917\C, 0, -7.312536, -0.08  
6711, -1.54811\H, 0, -7.880444, 0.779496, -1.186934\C, 0, -6.947639, -1.047777  
, -0.42246\H, 0, -6.850932, -0.509468, 0.52561\H, 0, -7.681761, -1.848669, -0.3  
28379\O, 0, -8.044506, -0.813588, -2.51568\H, 0, -8.308957, -0.214693, -3.2224  
99\H, 0, 7.227626, 3.821478, -0.274342\H, 0, 2.475247, 3.731234, 3.141479\H, 0,  
-5.324908, 4.087236, 1.75926\H, 0, 6.036408, 3.502806, -2.278709\O, 0, 1.37237  
2, -0.744314, -1.360077\O, 0, 2.927639, -0.305213, -1.227511\H, 0, 1.049919, 0.  
291423, 0.405038\O, 0, 2.609183, -1.803676, 1.070064\H, 0, 2.97417, -2.622231,  
0.69487\\Version=EM64L-G09RevA.01\State=2-A\HF=-3833.11232\S2=0.784473  
\S2-1=0.\S2A=0.750192\RMSD=5.115e-09\Dipole=0.8879745, 8.8355772, -0.309  
0444\Quadrupole=26.2885276, -11.7255777, -14.5629499, 22.1862996, 8.838619  
, -4.3661227\PG=C01 [X(C30H41N6O22P2)]\@

A-I2:

0, 0, 6. 309695, 3. 286337, -1. 459325\C, 0, 5  
. 320561, 3. 301464, -2. 469544\H, 0, 4. 96763, 4. 323678, -2. 671987\H, 0, 5. 686803  
, 2. 864962, -3. 407001\C, 0, 4. 156923, 2. 467736, -1. 974731\H, 0, 3. 285145, 2. 599  
645, -2. 626241\0, 0, 4. 567589, 1. 103483, -1. 969729\C, 0, 4. 1311, 0. 500085, -0. 7  
78949\H, 0, 2. 767081, -0. 436154, -1. 699564\N, 0, 4. 998528, -0. 670421, -0. 56553  
9\C, 0, 5. 720083, -0. 858723, 0. 597474\H, 0, 5. 644881, -0. 05965, 1. 323996\C, 0, 6  
. 456647, -1. 956366, 0. 851958\C, 0, 7. 234284, -2. 176331, 2. 112381\H, 0, 6. 90537  
7, -3. 093903, 2. 607905\H, 0, 8. 297029, -2. 303551, 1. 888199\H, 0, 7. 115114, -1. 3  
37967, 2. 802024\C, 0, 6. 514499, -3. 010064, -0. 162907\0, 0, 7. 149797, -4. 040107  
, -0. 066513\N, 0, 5. 760089, -2. 73622, -1. 307079\C, 0, 4. 892475, -1. 690469, -1. 5  
05147\0, 0, 4. 11054, -1. 659384, -2. 442374\C, 0, 3. 763778, 2. 813343, -0. 523703\  
H, 0, 4. 245251, 3. 736924, -0. 189901\C, 0, 4. 246945, 1. 603467, 0. 267562\H, 0, 5. 3  
03741, 1. 778957, 0. 481445\H, 0, 3. 673114, 1. 410928, 1. 17505\0, 0, 2. 337685, 2. 9  
69596, -0. 469426\P, 0, 1. 724809, 3. 756649, 0. 770832\0, 0, 1. 916824, 5. 285232, 0  
. 280579\0, 0, 2. 251641, 3. 509887, 2. 117371\0, 0, 0. 167188, 3. 462491, 0. 615644\  
C, 0, -0. 486094, 3. 499552, -0. 658464\H, 0, -1. 01294, 4. 455221, -0. 749497\H, 0, 0  
. 24116, 3. 397239, -1. 467392\C, 0, -1. 457407, 2. 337975, -0. 714136\H, 0, -2. 1201  
78, 2. 465327, -1. 581362\0, 0, -0. 721118, 1. 138402, -0. 821018\C, 0, -1. 211338, 0  
. 187341, 0. 121117\H, 0, -2. 040944, -0. 369116, -0. 325241\N, 0, -0. 165545, -0. 77  
3943, 0. 416441\C, 0, 0. 880648, -0. 390655, 1. 365956\C, 0, 1. 882173, -1. 54578, 1.  
628386\C, 0, 1. 283203, -2. 552541, 2. 619411\H, 0, 0. 360196, -3. 000131, 2. 239515  
\H, 0, 2. 011521, -3. 349979, 2. 788613\H, 0, 1. 097077, -2. 042769, 3. 569068\C, 0, 2  
. 214714, -2. 334041, 0. 373739\0, 0, 3. 270636, -2. 931988, 0. 288338\N, 0, 1. 22734  
6, -2. 422776, -0. 561242\C, 0, 0. 03607, -1. 696664, -0. 598682\0, 0, -0. 763111, -1  
. 899166, -1. 48759\C, 0, -2. 324161, 2. 219374, 0. 556084\H, 0, -2. 33879, 3. 136915  
, 1. 14959\C, 0, -1. 706477, 1. 035599, 1. 290427\H, 0, -0. 870978, 1. 426068, 1. 8758  
53\H, 0, -2. 422153, 0. 516307, 1. 931228\0, 0, -3. 66865, 1. 941688, 0. 109137\H, 0,  
0. 395827, -0. 209953, 2. 348524\0, 0, 1. 432563, 0. 821141, 1. 1219\0, 0, 2. 803357,  
0. 102836, -0. 887214\0, 0, 3. 066133, -0. 988429, 2. 129829\H, 0, 3. 751339, -1. 655  
88, 1. 956262\H, 0, 7. 1428, 3. 592775, -1. 829171\H, 0, 2. 039284, 5. 861373, 1. 0462  
1\P, 0, -4. 877859, 1. 840821, 1. 135346\0, 0, -4. 932748, 0. 686503, 2. 057091\0, 0,  
-4. 795405, 3. 232442, 1. 930701\0, 0, -6. 140148, 2. 014926, 0. 189318\C, 0, -6. 131  
565, 1. 894791, -1. 239796\H, 0, -5. 200832, 2. 299771, -1. 642543\H, 0, -6. 976756,  
2. 490191, -1. 591561\C, 0, -6. 306454, 0. 45459, -1. 658219\H, 0, -6. 454743, 0. 417  
077, -2. 747135\0, 0, -5. 144808, -0. 274232, -1. 291587\C, 0, -7. 514078, -0. 26845  
3, -1. 005842\C, 0, -5. 582393, -1. 608311, -1. 048513\H, 0, -8. 082417, 0. 408316, -  
0. 356222\C, 0, -6. 844332, -1. 397318, -0. 216193\0, 0, -8. 309216, -0. 747003, -2.  
073662\H, 0, -5. 815981, -2. 109673, -1. 992285\N, 0, -4. 507501, -2. 353682, -0. 44  
4669\H, 0, -6. 582387, -1. 043673, 0. 78585\H, 0, -7. 468676, -2. 290705, -0. 144755  
\H, 0, -9. 085432, -1. 183311, -1. 705437\C, 0, -4. 024601, -1. 98532, 0. 795574\C, 0  
, -3. 865698, -3. 319546, -1. 226107\H, 0, -4. 572975, -1. 190253, 1. 291362\C, 0, -2  
. 930688, -2. 530725, 1. 361495\N, 0, -2. 785713, -3. 904784, -0. 597702\0, 0, -4. 23  
4407, -3. 642841, -2. 333732\C, 0, -2. 426231, -2. 135148, 2. 71499\C, 0, -2. 187749

, -3. 531964, 0. 601492\H, 0, -2. 249769, -4. 532771, -1. 184061\H, 0, -2. 296825, -3. 014434, 3. 352911\H, 0, -1. 446427, -1. 652289, 2. 635439\H, 0, -3. 122492, -1. 442764, 3. 194843\O, 0, -1. 130805, -4. 035874, 0. 947429\H, 0, 5. 675006, -3. 490956, -1. 976678\H, 0, 1. 369912, -3. 047074, -1. 346292\H, 0, -4. 963163, 3. 09711, 2. 872301\\Version=EM64L-G09RevA. 01\State=2-A\HF=-3833. 2220934\S2=0. 754349\S2-1=0. \S2A=0. 750014\RMSD=2. 305e-09\Dipole=-2. 8980664, 5. 0218463, 1. 2728606\Quadrupole=25. 028213, -9. 1593958, -15. 8688172, 23. 3058683, -17. 2937648, -18. 2974047\PG=C01 [X(C30H41N6O22P2)]\@

### A-TS3:

0, 0, 6. 156416, 3. 540698, -1. 218959\C, 0, 5. 194319, 3. 514572, -2. 254466\H, 0, 4. 773342, 4. 513783, -2. 440916\H, 0, 5. 613822, 3. 129697, -3. 192434\C, 0, 4. 081219, 2. 589684, -1. 809727\H, 0, 3. 220271, 2. 666014, -2. 484458\O, 0, 4. 595182, 1. 261256, -1. 805461\C, 0, 4. 05712, 0. 594094, -0. 689406\H, 0, 2. 778218, -0. 275959, -1. 769906\N, 0, 4. 920008, -0. 58015, -0. 457099\C, 0, 5. 63936, -0. 756638, 0. 710103\H, 0, 5. 526686, 0. 028137, 1. 447182\C, 0, 6. 415054, -1. 827241, 0. 961152\C, 0, 7. 173836, -2. 0396, 2. 233845\H, 0, 6. 859062, -2. 970981, 2. 712626\H, 0, 8. 24347, -2. 136281, 2. 028489\H, 0, 7. 019203, -1. 212564, 2. 930064\C, 0, 6. 540077, -2. 856333, -0. 072353\O, 0, 7. 218541, -3. 859004, 0. 01626\N, 0, 5. 803834, -2. 586329, -1. 228533\C, 0, 4. 891519, -1. 578515, -1. 422805\O, 0, 4. 136923, -1. 565329, -2. 38512\C, 0, 3. 616494, 2. 881249, -0. 366221\H, 0, 4. 079537, 3. 793869, 0. 019069\C, 0, 4. 059239, 1. 648452, 0. 412211\H, 0, 5. 082753, 1. 837435, 0. 74193\H, 0, 3. 40106, 1. 400175, 1. 246269\O, 0, 2. 18779, 3. 033218, -0. 362243\P, 0, 1. 556526, 3. 766444, 0. 900667\O, 0, 1. 735234, 5. 316267, 0. 47785\O, 0, 2. 075194, 3. 463728, 2. 237734\O, 0, 0. 005199, 3. 462974, 0. 714596\C, 0, -0. 641774, 3. 566114, -0. 558603\H, 0, -1. 293148, 4. 445035, -0. 539058\H, 0, 0. 090429, 3. 66392, -1. 363927\C, 0, -1. 452146, 2. 30331, -0. 758013\H, 0, -2. 161608, 2. 441384, -1. 586719\O, 0, -0. 560294, 1. 24073, -1. 022584\C, 0, -1. 058418, 0. 054444, -0. 422674\H, 0, -1. 778928, -0. 431254, -1. 096934\N, 0, 0. 023663, -0. 85654, -0. 151324\C, 0, 0. 427134, -0. 955227, 1. 258636\C, 0, 1. 744595, -1. 737721, 1. 516433\C, 0, 1. 490625, -2. 769194, 2. 617752\H, 0, 0. 711955, -3. 475209, 2. 317348\H, 0, 2. 415763, -3. 314212, 2. 818867\H, 0, 1. 182483, -2. 232559, 3. 519694\C, 0, 2. 286328, -2. 470238, 0. 286397\O, 0, 3. 359977, -3. 03863, 0. 378389\N, 0, 1. 561135, -2. 464194, -0. 865027\C, 0, 0. 456781, -1. 665093, -1. 157933\O, 0, -0. 050826, -1. 711847, -2. 265299\C, 0, -2. 257517, 1. 916548, 0. 506815\H, 0, -2. 151931, 2. 648825, 1. 311371\C, 0, -1. 704956, 0. 555949, 0. 856862\H, 0, -0. 661801, 0. 714991, 1. 581198\H, 0, -2. 360035, -0. 122427, 1. 407306\O, 0, -3. 650797, 1. 855258, 0. 12877\H, 0, -0. 365288, -1. 535228, 1. 752475\O, 0, 0. 503314, 0. 307344, 1. 813645\O, 0, 2. 75052, 0. 211793, -0. 927102\O, 0, 2. 762216, -0. 84575, 1. 919341\H, 0, 3. 563054, -1. 393572, 1. 947683\H, 0, 6. 952576, 3. 973656, -1. 540594\H, 0, 1. 850106, 5. 859674, 1. 268209\P, 0, -4. 76041, 1. 566726, 1. 2351\O, 0, -4. 735813, 0. 261927, 1. 928634\O, 0, -4. 583061, 2. 786098, 2. 262459\O, 0, -6. 105375, 1. 937228, 0. 475121\C, 0, -6. 270199, 1. 937335, -0. 949019\H, 0, -5. 399369, 2. 398557, -1. 420907\H, 0, -7. 158313, 2. 542054,

-1. 143668\C, 0, -6. 463434, 0. 531944, -1. 469466\H, 0, -6. 707544, 0. 573275, -2. 5  
40214\O, 0, -5. 253434, -0. 176552, -1. 256629\C, 0, -7. 582287, -0. 278798, -0. 767  
199\C, 0, -5. 611931, -1. 526355, -0. 990342\H, 0, -8. 147689, 0. 343718, -0. 062615  
\C, 0, -6. 801975, -1. 387784, -0. 048252\O, 0, -8. 413385, -0. 777604, -1. 796774\H  
, 0, -5. 914284, -2. 007917, -1. 926032\N, 0, -4. 43723, -2. 226504, -0. 521685\H, 0,  
-6. 477588, -1. 018749, 0. 92793\H, 0, -7. 383405, -2. 306214, 0. 062074\H, 0, -9. 14  
5044, -1. 2597, -1. 395409\C, 0, -4. 122507, -2. 377753, 0. 811248\C, 0, -3. 532039,  
-2. 585823, -1. 530683\H, 0, -4. 867037, -2. 01984, 1. 50838\C, 0, -2. 964381, -2. 91  
2877, 1. 250516\N, 0, -2. 345166, -3. 11021, -1. 058391\O, 0, -3. 768771, -2. 443167  
, -2. 707952\C, 0, -2. 649021, -3. 112306, 2. 70249\C, 0, -1. 959234, -3. 296316, 0. 2  
64823\H, 0, -1. 630888, -3. 239126, -1. 771563\H, 0, -1. 760019, -2. 547543, 3. 0017  
87\H, 0, -3. 484561, -2. 787162, 3. 325625\H, 0, -2. 437642, -4. 164994, 2. 910719\O  
, 0, -0. 84603, -3. 725774, 0. 533561\H, 0, 5. 770897, -3. 326302, -1. 918891\H, 0, 1.  
970552, -2. 931705, -1. 666647\H, 0, -4. 605621, 2. 467012, 3. 173897\\Version=EM  
64L-G09RevA. 01\State=2-A\HF=-3833. 1873533\S2=0. 759471\S2-1=0. \S2A=0. 75  
0043\RMSD=4. 045e-09\Dipole=-4. 2737539, 4. 0175063, 1. 7461245\Quadrupole=3  
0. 9886415, -4. 3000319, -26. 6886096, 34. 5702735, -18. 932554, -20. 8435895\PG=  
C01 [X(C30H41N6O22P2)]\ \@

#### A-I3:

0, 0, 6. 248078, 3. 651599, -1. 026619\C, 0, 5. 38545,  
3. 57948, -2. 143975\H, 0, 4. 926766, 4. 554817, -2. 364265\H, 0, 5. 906918, 3. 22571  
1, -3. 042123\C, 0, 4. 291447, 2. 590972, -1. 801907\H, 0, 3. 488234, 2. 629859, -2. 5  
47052\O, 0, 4. 875454, 1. 289168, -1. 768685\C, 0, 4. 315078, 0. 588306, -0. 692868\  
H, 0, 3. 176362, -0. 414427, -1. 84378\N, 0, 5. 20209, -0. 540681, -0. 399774\C, 0, 5.  
781196, -0. 727497, 0. 843018\H, 0, 5. 58022, 0. 047759, 1. 571344\C, 0, 6. 533174, -  
1. 796274, 1. 162382\C, 0, 7. 158835, -2. 015204, 2. 504975\H, 0, 6. 803768, -2. 9523  
7, 2. 942253\H, 0, 8. 244632, -2. 103091, 2. 409797\H, 0, 6. 927233, -1. 19469, 3. 187  
227\C, 0, 6. 763272, -2. 820715, 0. 141966\O, 0, 7. 425586, -3. 825491, 0. 297154\N,  
0, 6. 14633, -2. 550054, -1. 083169\C, 0, 5. 272318, -1. 534018, -1. 370667\O, 0, 4. 6  
24907, -1. 502678, -2. 406994\C, 0, 3. 696848, 2. 836371, -0. 398205\H, 0, 4. 06027,  
3. 774807, 0. 026803\C, 0, 4. 178287, 1. 6359, 0. 40776\H, 0, 5. 173803, 1. 886134, 0.  
780728\H, 0, 3. 503793, 1. 346443, 1. 216854\O, 0, 2. 2597, 2. 869339, -0. 490349\P,  
0, 1. 512531, 3. 777439, 0. 595751\O, 0, 1. 560284, 5. 214829, -0. 143076\O, 0, 2. 044  
915, 3. 800831, 1. 961074\O, 0, 0. 004605, 3. 302189, 0. 46865\C, 0, -0. 684253, 3. 25  
2914, -0. 783718\H, 0, -1. 26698, 4. 173078, -0. 893001\H, 0, 0. 021382, 3. 163235, -  
1. 614711\C, 0, -1. 597256, 2. 042407, -0. 773998\H, 0, -2. 357532, 2. 159358, -1. 55  
9035\O, 0, -0. 824774, 0. 883272, -1. 01116\C, 0, -1. 287052, -0. 199979, -0. 205316  
\H, 0, -1. 989929, -0. 808604, -0. 791852\N, 0, -0. 169605, -1. 062285, 0. 13067\C, 0  
, 0. 743996, -0. 580131, 1. 179263\C, 0, 1. 832068, -1. 644428, 1. 471364\C, 0, 1. 249  
396, -2. 758131, 2. 352648\H, 0, 0. 40589, -3. 258951, 1. 866573\H, 0, 2. 028355, -3.  
498817, 2. 553165\H, 0, 0. 930157, -2. 321374, 3. 303232\C, 0, 2. 359431, -2. 341973  
, 0. 228679\O, 0, 3. 477391, -2. 822362, 0. 209305\N, 0, 1. 468411, -2. 494995, -0. 79



2125\C, 0, 0. 215228, -1. 894282, -0. 907745\0, 0, -0. 468727, -2. 119988, -1. 88415  
1\C, 0, -2. 334446, 1. 838597, 0. 571229\H, 0, -2. 064433, 2. 585598, 1. 324274\C, 0,  
-1. 960054, 0. 4565, 0. 950772\H, 0, 1. 621893, 0. 707767, 0. 031043\H, 0, -2. 309118  
, -0. 048491, 1. 839596\0, 0, -3. 753379, 1. 997677, 0. 284872\H, 0, 0. 154708, -0. 47  
9888, 2. 097899\0, 0, 1. 214699, 0. 691852, 0. 914432\0, 0, 3. 042657, 0. 121414, -1.  
037427\0, 0, 2. 912402, -1. 007904, 2. 104545\H, 0, 3. 661717, -1. 616861, 1. 996613  
\H, 0, 7. 059044, 4. 101134, -1. 281651\H, 0, 1. 589443, 5. 921871, 0. 514613\P, 0, -4  
. 85877, 1. 753872, 1. 396527\0, 0, -4. 849103, 0. 481774, 2. 149759\0, 0, -4. 69235,  
3. 0147, 2. 37397\0, 0, -6. 192753, 2. 077274, 0. 593949\C, 0, -6. 300853, 2. 060359,  
-0. 835773\H, 0, -5. 413802, 2. 516541, -1. 280319\H, 0, -7. 180507, 2. 663399, -1. 0  
70827\C, 0, -6. 493618, 0. 656434, -1. 359825\H, 0, -6. 730035, 0. 711016, -2. 43241  
9\0, 0, -5. 301861, -0. 088974, -1. 154859\C, 0, -7. 640848, -0. 134968, -0. 679581\  
C, 0, -5. 716243, -1. 443146, -0. 987069\H, 0, -8. 161415, 0. 478466, 0. 066081\C, 0,  
-6. 904696, -1. 315593, -0. 038347\0, 0, -8. 513502, -0. 53416, -1. 719039\H, 0, -6.  
033791, -1. 85515, -1. 949435\N, 0, -4. 595193, -2. 23962, -0. 553417\H, 0, -6. 5683  
91, -1. 034139, 0. 963701\H, 0, -7. 517792, -2. 218315, 0. 010297\H, 0, -9. 260201, -  
1. 002653, -1. 329641\C, 0, -4. 097446, -2. 127084, 0. 730483\C, 0, -3. 93157, -2. 99  
1799, -1. 531916\H, 0, -4. 642279, -1. 452781, 1. 382307\C, 0, -2. 987984, -2. 76057  
, 1. 15855\N, 0, -2. 810511, -3. 64381, -1. 061651\0, 0, -4. 310583, -3. 079087, -2. 6  
78885\C, 0, -2. 453837, -2. 624303, 2. 550188\C, 0, -2. 233728, -3. 566482, 0. 20311  
5\H, 0, -2. 244457, -4. 082426, -1. 77901\H, 0, -2. 31462, -3. 605185, 3. 013453\H, 0  
, -1. 471027, -2. 140372, 2. 537396\H, 0, -3. 131401, -2. 028724, 3. 167191\0, 0, -1.  
178661, -4. 132708, 0. 438653\H, 0, 6. 185684, -3. 286828, -1. 776748\H, 0, 1. 74130  
5, -3. 064684, -1. 584245\H, 0, -4. 783688, 2. 741784, 3. 295942\\Version=EM64L-G  
09RevA. 01\State=2-A\HF=-3833. 2385435\S2=0. 755432\S2-1=0. \S2A=0. 750024\  
RMSD=2. 542e-09\Dipole=-2. 7667804, 4. 3958105, 1. 0948831\Quadrupole=25. 650  
0317, -6. 4553441, -19. 1946875, 27. 5188515, -20. 6473413, -21. 4966641\PG=C01  
[X(C30H41N6O22P2)]\@

A-TS4:

0, 0, 6. 365706, 2. 441467, -0. 103773\C, 0, 5. 848276  
, 3. 071796, -1. 263796\H, 0, 5. 771324, 4. 15876, -1. 12232\H, 0, 6. 471425, 2. 87035  
9, -2. 14426\C, 0, 4. 460428, 2. 513983, -1. 507437\H, 0, 3. 94518, 3. 111779, -2. 266  
556\0, 0, 4. 57365, 1. 166969, -1. 956128\C, 0, 3. 809969, 0. 273993, -1. 163975\H, 0  
, 2. 614381, -0. 764983, -2. 276771\N, 0, 4. 676364, -0. 930884, -1. 055185\C, 0, 5. 9  
09743, -0. 744146, -0. 440848\H, 0, 6. 135754, 0. 289561, -0. 200044\C, 0, 6. 779467  
, -1. 733978, -0. 179762\C, 0, 8. 098258, -1. 533344, 0. 498833\H, 0, 8. 145609, -2. 1  
24068, 1. 417688\H, 0, 8. 91643, -1. 875626, -0. 140896\H, 0, 8. 254024, -0. 480955,  
0. 745154\C, 0, 6. 437065, -3. 090978, -0. 599847\0, 0, 7. 111817, -4. 082025, -0. 41  
5587\N, 0, 5. 236159, -3. 162297, -1. 312673\C, 0, 4. 326667, -2. 167543, -1. 549492  
\0, 0, 3. 296438, -2. 408277, -2. 183907\C, 0, 3. 614572, 2. 487976, -0. 220971\H, 0,  
4. 024665, 3. 115662, 0. 573049\C, 0, 3. 611306, 1. 01857, 0. 161456\H, 0, 4. 298433,  
0. 757851, 0. 96461\H, 0, 2. 463713, 0. 855501, 0. 653842\0, 0, 2. 289501, 2. 922016,

-0.556498\p, 0, 1.569431, 4.031268, 0.333061\0, 0, 1.70361, 5.310728, -0.64666  
 5\0, 0, 2.062158, 4.262705, 1.693722\0, 0, 0.032302, 3.625835, 0.23724\C, 0, -0.  
 565022, 3.370991, -1.043507\h, 0, -1.147764, 4.251427, -1.33198\h, 0, 0.200658  
 , 3.169764, -1.797516\C, 0, -1.448107, 2.150149, -0.907343\h, 0, -2.076258, 2.0  
 55251, -1.804498\0, 0, -0.613612, 1.024442, -0.752954\C, 0, -1.130258, 0.19434  
 6, 0.280508\h, 0, -1.900585, -0.464517, -0.133462\N, 0, -0.068583, -0.652472, 0  
 .787946\C, 0, 0.852622, -0.088507, 1.771839\C, 0, 1.832028, -1.165426, 2.29699  
 8\C, 0, 1.119012, -2.161034, 3.217318\h, 0, 0.311303, -2.693336, 2.708262\h, 0,  
 1.852918, -2.890208, 3.571357\h, 0, 0.730015, -1.617923, 4.083294\C, 0, 2.4158  
 6, -1.955999, 1.136604\0, 0, 3.574826, -2.337818, 1.168883\N, 0, 1.545496, -2.2  
 60939, 0.139125\C, 0, 0.318065, -1.636209, -0.109852\0, 0, -0.342523, -1.96920  
 7, -1.068\C, 0, -2.366477, 2.203849, 0.333493\h, 0, -2.432376, 3.203695, 0.7695  
 07\C, 0, -1.740572, 1.181028, 1.273797\h, 0, -0.957676, 1.704178, 1.828615\h, 0  
 , -2.463685, 0.727087, 1.955712\0, 0, -3.684262, 1.813223, -0.109332\h, 0, 0.25  
 7743, 0.217399, 2.647635\0, 0, 1.44892, 1.08086, 1.359579\0, 0, 2.57573, 0.0085  
 49, -1.682259\0, 0, 2.873814, -0.515833, 2.96712\h, 0, 3.651852, -1.081651, 2.8  
 36918\h, 0, 7.238738, 2.798035, 0.08923\h, 0, 1.636214, 6.127891, -0.135745\p,  
 0, -4.925741, 1.830793, 0.882036\0, 0, -5.009611, 0.799578, 1.93718\0, 0, -4.87  
 3675, 3.31119, 1.501659\0, 0, -6.16193, 1.865383, -0.113149\C, 0, -6.100279, 1.  
 668172, -1.532077\h, 0, -5.161577, 2.063171, -1.925714\h, 0, -6.940824, 2.2277  
 68, -1.948546\C, 0, -6.236792, 0.200696, -1.864682\h, 0, -6.34722, 0.088725, -2  
 .952658\0, 0, -5.075291, -0.47562, -1.409655\C, 0, -7.45141, -0.497397, -1.200  
 498\C, 0, -5.493609, -1.780665, -1.020053\h, 0, -8.080261, 0.220892, -0.660082  
 \C, 0, -6.786574, -1.504093, -0.257392\0, 0, -8.167222, -1.124256, -2.24758\h,  
 0, -5.687432, -2.394515, -1.904105\N, 0, -4.420113, -2.420905, -0.303128\h, 0,  
 -6.572644, -1.021697, 0.701555\h, 0, -7.393252, -2.398123, -0.096545\h, 0, -8.  
 941739, -1.557675, -1.872289\C, 0, -4.03674, -1.956883, 0.940268\C, 0, -3.6530  
 02, -3.359994, -1.002169\h, 0, -4.660314, -1.174812, 1.360057\C, 0, -2.949548,  
 -2.399193, 1.600843\N, 0, -2.569555, -3.826916, -0.287813\0, 0, -3.92411, -3.7  
 50758, -2.116227\C, 0, -2.559928, -1.898112, 2.957178\C, 0, -2.099108, -3.3906  
 44, 0.94692\h, 0, -1.94547, -4.428578, -0.811924\h, 0, -2.452931, -2.727145, 3.  
 663004\h, 0, -1.590984, -1.390272, 2.913707\h, 0, -3.309162, -1.197706, 3.3347  
 96\0, 0, -1.056894, -3.833728, 1.401653\h, 0, 4.964182, -4.07611, -1.653994\h,  
 0, 1.891024, -2.804722, -0.64884\h, 0, -5.05737, 3.288052, 2.449694\\Version=  
 EM64L-G09RevA.01\State=2-A\HF=-3833.197293\S2=0.760009\S2-1=0.\S2A=0.7  
 50046\RMSD=1.732e-09\Dipole=-1.735641, 5.078806, 0.6237919\Quadrupole=45  
 .633609, -15.891458, -29.742151, 24.8968281, -14.5147392, -19.1175808\PG=C0  
 1 [X(C30H41N6O22P2)]\ \@

A-I4:

0, 0, 6.647344, 2.277433, -0.441855\C, 0, 6.095152  
 , 2.952064, -1.556041\h, 0, 6.187833, 4.043312, -1.452651\h, 0, 6.574446, 2.645  
 855, -2.493923\C, 0, 4.626673, 2.576767, -1.634275\h, 0, 4.125884, 3.166871, -2

. 40766\0, 0, 4. 521603, 1. 193742, -1. 971438\C, 0, 4. 055222, 0. 43256, -0. 885207\  
H, 0, 2. 860459, -0. 627547, -1. 939492\N, 0, 4. 975173, -0. 706574, -0. 680431\C, 0,  
5. 89042, -0. 704373, 0. 356172\H, 0, 5. 897639, 0. 202602, 0. 94982\C, 0, 6. 725298,  
-1. 72812, 0. 615242\C, 0, 7. 708628, -1. 747936, 1. 744308\H, 0, 7. 510448, -2. 5939  
22, 2. 408097\H, 0, 8. 72541, -1. 878324, 1. 363463\H, 0, 7. 660645, -0. 824319, 2. 32  
4645\C, 0, 6. 695717, -2. 894454, -0. 2671\0, 0, 7. 38735, -3. 884793, -0. 145498\N,  
0, 5. 795298, -2. 775572, -1. 330395\C, 0, 4. 898027, -1. 767533, -1. 567769\0, 0, 4.  
111258, -1. 80838, -2. 506144\C, 0, 3. 918163, 2. 740647, -0. 28526\H, 0, 4. 368532,  
3. 505986, 0. 35214\C, 0, 3. 992447, 1. 375024, 0. 278484\H, 0, 3. 652612, 1. 07742, 1  
. 260622\H, 0, 1. 525918, 0. 753223, 0. 02721\0, 0, 2. 523068, 3. 079437, -0. 547403\  
P, 0, 1. 730925, 3. 934967, 0. 546928\0, 0, 1. 730221, 5. 391281, -0. 151773\0, 0, 2. 2  
46244, 3. 930864, 1. 919294\0, 0, 0. 232219, 3. 422223, 0. 384747\C, 0, -0. 388985, 3  
. 348103, -0. 904584\H, 0, -0. 861726, 4. 311921, -1. 121267\H, 0, 0. 353985, 3. 1207  
78, -1. 674995\C, 0, -1. 420822, 2. 237013, -0. 87641\H, 0, -2. 077292, 2. 347768, -1  
. 750238\0, 0, -0. 760982, 0. 987226, -0. 91531\C, 0, -1. 296422, 0. 123884, 0. 09520  
8\H, 0, -2. 152765, -0. 418447, -0. 315574\N, 0, -0. 283661, -0. 853167, 0. 446423\C  
, 0, 0. 770708, -0. 412596, 1. 366446\C, 0, 1. 800615, -1. 542692, 1. 61941\C, 0, 1. 24  
1896, -2. 531436, 2. 651789\H, 0, 0. 308298, -2. 991672, 2. 314338\H, 0, 1. 979502, -  
3. 319891, 2. 823343\H, 0, 1. 079591, -1. 995815, 3. 591298\C, 0, 2. 121683, -2. 3618  
44, 0. 382474\0, 0, 3. 205812, -2. 900644, 0. 25516\N, 0, 1. 085179, -2. 54877, -0. 48  
3585\C, 0, -0. 11754, -1. 839675, -0. 51278\0, 0, -0. 947658, -2. 099875, -1. 357912  
\C, 0, -2. 290983, 2. 238199, 0. 397129\H, 0, -2. 265572, 3. 192546, 0. 929465\C, 0, -  
1. 729216, 1. 076381, 1. 205285\H, 0, -0. 857254, 1. 451356, 1. 745399\H, 0, -2. 4619  
51, 0. 641897, 1. 888365\0, 0, -3. 645183, 1. 991067, -0. 039831\H, 0, 0. 300113, -0.  
217567, 2. 337884\0, 0, 1. 306781, 0. 803278, 0. 973754\0, 0, 2. 774957, -0. 049118,  
-1. 152583\0, 0, 2. 994222, -0. 961655, 2. 080146\H, 0, 3. 689127, -1. 603751, 1. 857  
385\H, 0, 7. 607377, 2. 300291, -0. 502877\H, 0, 1. 709723, 6. 080921, 0. 524505\P, 0  
, -4. 859837, 1. 984738, 0. 985008\0, 0, -4. 954063, 0. 890133, 1. 973715\0, 0, -4. 74  
1581, 3. 417771, 1. 697831\0, 0, -6. 110629, 2. 141615, 0. 02073\C, 0, -6. 104027, 1.  
893987, -1. 391537\H, 0, -5. 160599, 2. 233013, -1. 824651\H, 0, -6. 929274, 2. 4826  
91, -1. 798005\C, 0, -6. 326252, 0. 429767, -1. 684982\H, 0, -6. 47919, 0. 305324, -2  
. 7669\0, 0, -5. 189294, -0. 305969, -1. 259754\C, 0, -7. 555843, -0. 19444, -0. 9735  
06\C, 0, -5. 675171, -1. 600974, -0. 91326\H, 0, -8. 098138, 0. 553335, -0. 381884\C  
, 0, -6. 922548, -1. 277161, -0. 094472\0, 0, -8. 371311, -0. 730989, -1. 997675\H, 0  
, -5. 937647, -2. 160924, -1. 81537\N, 0, -4. 626151, -2. 343601, -0. 263697\H, 0, -6  
. 640655, -0. 852071, 0. 87406\H, 0, -7. 578581, -2. 13806, 0. 052502\H, 0, -9. 15864  
6, -1. 111943, -1. 593374\C, 0, -4. 115192, -1. 908233, 0. 944218\C, 0, -4. 036749, -  
3. 392732, -0. 975601\H, 0, -4. 625739, -1. 056761, 1. 384319\C, 0, -3. 038993, -2. 4  
58366, 1. 538629\N, 0, -2. 981479, -3. 982777, -0. 311239\0, 0, -4. 430062, -3. 7781  
54, -2. 054937\C, 0, -2. 495959, -1. 987046, 2. 85245\C, 0, -2. 3478, -3. 542003, 0. 8  
46244\H, 0, -2. 479968, -4. 674393, -0. 854864\H, 0, -2. 388248, -2. 823257, 3. 5493  
18\H, 0, -1. 501001, -1. 548007, 2. 723446\H, 0, -3. 158215, -1. 237365, 3. 292651\0  
, 0, -1. 30518, -4. 059213, 1. 214392\H, 0, 5. 710026, -3. 57749, -1. 942734\H, 0, 1. 2  
10588, -3. 202311, -1. 247193\H, 0, -4. 912499, 3. 339473, 2. 645331\\Version=EM6

4L-G09RevA. 01\State=2-A\HF=-3833. 2373244\S2=0. 755085\S2-1=0. \S2A=0. 750  
02\RMSD=1. 873e-09\Dipole=-1. 8554747, 5. 3126672, 0. 9279588\Quadrupole=36.  
3354905, -12. 4461885, -23. 889302, 22. 5105837, -16. 1642252, -16. 3146012\PG=C  
01 [X(C30H41N6O22P2)]\ \@

A-TS5:

0, 0, 6. 315057, 3. 208285, -1. 578948\C, 0, 5  
. 308236, 3. 216441, -2. 571472\H, 0, 4. 99152, 4. 241696, -2. 813343\H, 0, 5. 637026  
, 2. 723609, -3. 494413\C, 0, 4. 122512, 2. 449896, -2. 021346\H, 0, 3. 23932, 2. 6052  
1, -2. 651455\O, 0, 4. 466903, 1. 069397, -1. 995743\C, 0, 4. 091613, 0. 507436, -0. 7  
65492\H, 0, 2. 022305, 0. 649809, -0. 143639\N, 0, 4. 942478, -0. 657472, -0. 545156  
\C, 0, 5. 632668, -0. 84703, 0. 637675\H, 0, 5. 532362, -0. 054416, 1. 368259\C, 0, 6.  
364646, -1. 94177, 0. 913109\C, 0, 7. 104426, -2. 158363, 2. 197109\H, 0, 6. 772376,  
-3. 083282, 2. 676647\H, 0, 8. 175812, -2. 269868, 2. 008087\H, 0, 6. 95106, -1. 3258  
88, 2. 887378\C, 0, 6. 45761, -2. 994335, -0. 101654\O, 0, 7. 09255, -4. 022928, 0. 02  
0211\N, 0, 5. 751252, -2. 716825, -1. 270352\C, 0, 4. 873671, -1. 676177, -1. 506971  
\O, 0, 4. 142782, -1. 642439, -2. 469465\C, 0, 3. 790868, 2. 842131, -0. 569318\H, 0,  
4. 272543, 3. 779152, -0. 276544\C, 0, 4. 300807, 1. 654047, 0. 235457\H, 0, 5. 37617  
1, 1. 796374, 0. 363879\H, 0, 3. 792804, 1. 515818, 1. 190942\O, 0, 2. 362898, 2. 9754  
8, -0. 466224\P, 0, 1. 764934, 3. 778633, 0. 777249\O, 0, 1. 908659, 5. 296709, 0. 248  
456\O, 0, 2. 339364, 3. 562432, 2. 108836\O, 0, 0. 215962, 3. 43476, 0. 658209\C, 0, -  
0. 46939, 3. 500929, -0. 60037\H, 0, -1. 004601, 4. 454434, -0. 653855\H, 0, 0. 23950  
7, 3. 426717, -1. 428803\C, 0, -1. 43262, 2. 333788, -0. 662137\H, 0, -2. 102641, 2. 4  
66438, -1. 522703\O, 0, -0. 687301, 1. 140853, -0. 788639\C, 0, -1. 182638, 0. 16728  
7, 0. 132966\H, 0, -2. 015808, -0. 373235, -0. 325141\N, 0, -0. 142209, -0. 8042, 0. 4  
06743\C, 0, 0. 93139, -0. 418535, 1. 313049\C, 0, 1. 879407, -1. 606706, 1. 607836\C  
, 0, 1. 229524, -2. 586664, 2. 590132\H, 0, 0. 308968, -3. 021588, 2. 1914\H, 0, 1. 937  
917, -3. 395885, 2. 786002\H, 0, 1. 02987, -2. 0646, 3. 530207\C, 0, 2. 20512, -2. 398  
36, 0. 348352\O, 0, 3. 257746, -2. 999857, 0. 262657\N, 0, 1. 210521, -2. 48265, -0. 5  
78641\C, 0, 0. 037836, -1. 732714, -0. 617003\O, 0, -0. 773384, -1. 912002, -1. 4982  
38\C, 0, -2. 288024, 2. 193776, 0. 613753\H, 0, -2. 295469, 3. 100867, 1. 223374\C, 0  
, -1. 663773, 0. 997305, 1. 3201\H, 0, -0. 81799, 1. 377207, 1. 899008\H, 0, -2. 36998  
, 0. 469356, 1. 964026\O, 0, -3. 635921, 1. 925022, 0. 175411\H, 0, 0. 485583, -0. 155  
835, 2. 285117\O, 0, 1. 576837, 0. 737183, 0. 931411\O, 0, 2. 757597, 0. 108852, -0. 8  
61967\O, 0, 3. 071225, -1. 086196, 2. 12911\H, 0, 3. 749265, -1. 755251, 1. 932253\H  
, 0, 7. 156308, 3. 447075, -1. 978822\H, 0, 2. 050543, 5. 895241, 0. 993493\P, 0, -4. 8  
37198, 1. 822867, 1. 211966\O, 0, -4. 887924, 0. 66507, 2. 128663\O, 0, -4. 736389, 3  
. 211639, 2. 01127\O, 0, -6. 107693, 1. 998796, 0. 278413\C, 0, -6. 103203, 1. 95613,  
-1. 155406\H, 0, -5. 171492, 2. 376788, -1. 539167\H, 0, -6. 946537, 2. 572197, -1. 4  
74523\C, 0, -6. 285453, 0. 538279, -1. 643005\H, 0, -6. 42605, 0. 552372, -2. 733346  
\O, 0, -5. 131942, -0. 214622, -1. 300513\C, 0, -7. 503522, -0. 202409, -1. 031815\C  
, 0, -5. 578749, -1. 552842, -1. 097371\H, 0, -8. 079278, 0. 454206, -0. 368051\C, 0,  
-6. 847824, -1. 358564, -0. 271806\O, 0, -8. 284828, -0. 644028, -2. 125425\H, 0, -5

. 803556, -2. 029165, -2. 055946\N, 0, -4. 515316, -2. 318315, -0. 498585\H, 0, -6. 5  
94317, -1. 038731, 0. 743791\H, 0, -7. 477311, -2. 250362, -0. 233071\H, 0, -9. 0630  
21, -1. 096513, -1. 781752\C, 0, -4. 041838, -1. 976973, 0. 753029\C, 0, -3. 877427,  
-3. 280194, -1. 288572\H, 0, -4. 586669, -1. 186285, 1. 259088\C, 0, -2. 960418, -2.  
543567, 1. 321391\N, 0, -2. 813385, -3. 890515, -0. 657129\O, 0, -4. 238354, -3. 579  
732, -2. 405348\C, 0, -2. 466407, -2. 175703, 2. 686641\C, 0, -2. 223859, -3. 544889  
, 0. 554707\H, 0, -2. 277294, -4. 514265, -1. 247998\H, 0, -2. 357049, -3. 066738, 3.  
311883\H, 0, -1. 478939, -1. 705705, 2. 626104\H, 0, -3. 15962, -1. 481323, 3. 16818  
4\O, 0, -1. 17942, -4. 069858, 0. 905819\H, 0, 5. 699505, -3. 467693, -1. 947348\H, 0  
, 1. 379392, -3. 049957, -1. 400896\H, 0, -4. 908497, 3. 076936, 2. 952229\\Version  
=EM64L-G09RevA.01\State=2-A\HF=-3833.196155\S2=0.759657\S2-1=0. \S2A=0.  
750045\RMSD=2.226e-09\Dipole=-3.2374471, 5.9035545, 1.7632655\Quadrupole  
=24.5785947, -6.2839095, -18.2946852, 26.9951667, -15.684577, -18.8279158\P  
G=C01 [X(C30H41N6O22P2)]\@

A-I5:

0, 0, 6. 304847, 3. 415667, -1. 258883\C, 0, 5. 34521,  
3. 413265, -2. 296996\H, 0, 4. 934452, 4. 418922, -2. 470496\H, 0, 5. 761133, 3. 0351  
93, -3. 238946\C, 0, 4. 221829, 2. 494774, -1. 864041\H, 0, 3. 358979, 2. 595398, -2.  
532339\O, 0, 4. 714623, 1. 159526, -1. 890287\C, 0, 4. 219254, 0. 473444, -0. 773185  
\H, 0, 1. 342402, 0. 9663, 0. 180118\N, 0, 5. 04701, -0. 707541, -0. 57751\C, 0, 5. 824  
457, -0. 93377, 0. 541559\H, 0, 5. 834614, -0. 136618, 1. 274867\C, 0, 6. 520823, -2.  
06794, 0. 738649\C, 0, 7. 361463, -2. 341741, 1. 946622\H, 0, 7. 009775, -3. 240598,  
2. 460363\H, 0, 8. 398352, -2. 530776, 1. 655317\H, 0, 7. 336114, -1. 5014, 2. 643723  
\C, 0, 6. 467445, -3. 112298, -0. 28937\O, 0, 7. 057633, -4. 171592, -0. 232844\N, 0,  
5. 67172, -2. 792004, -1. 391973\C, 0, 4. 838178, -1. 707453, -1. 528852\O, 0, 4. 008  
875, -1. 604273, -2. 409628\C, 0, 3. 772445, 2. 767433, -0. 411788\H, 0, 4. 224129, 3  
. 680636, -0. 016599\C, 0, 4. 247503, 1. 53862, 0. 350484\H, 0, 5. 297938, 1. 704369,  
0. 602698\H, 0, 3. 644627, 1. 280309, 1. 222468\O, 0, 2. 337563, 2. 883178, -0. 38554  
2\P, 0, 1. 699706, 3. 885712, 0. 687304\O, 0, 1. 842138, 5. 286251, -0. 104614\O, 0, 2  
. 252692, 3. 913782, 2. 043166\O, 0, 0. 15608, 3. 51154, 0. 589363\C, 0, -0. 519685, 3  
. 492418, -0. 675401\H, 0, -1. 07569, 4. 428789, -0. 785368\H, 0, 0. 196887, 3. 39366  
, -1. 495777\C, 0, -1. 458048, 2. 304106, -0. 686894\H, 0, -2. 121813, 2. 382651, -1.  
558713\O, 0, -0. 689526, 1. 11948, -0. 755296\C, 0, -1. 229443, 0. 153004, 0. 160578  
\H, 0, -2. 051078, -0. 378842, -0. 326533\N, 0, -0. 194996, -0. 811765, 0. 466169\C,  
0, 0. 816777, -0. 417259, 1. 444309\C, 0, 1. 855811, -1. 541826, 1. 667896\C, 0, 1. 29  
5203, -2. 575105, 2. 653438\H, 0, 0. 378139, -3. 038519, 2. 276997\H, 0, 2. 04167, -3  
. 358569, 2. 808319\H, 0, 1. 103856, -2. 079059, 3. 609137\C, 0, 2. 213948, -2. 31075  
4, 0. 408107\O, 0, 3. 285283, -2. 882188, 0. 323338\N, 0, 1. 235331, -2. 416075, -0. 5  
32562\C, 0, 0. 034507, -1. 714115, -0. 567822\O, 0, -0. 758118, -1. 907421, -1. 4641  
98\C, 0, -2. 330256, 2. 1948, 0. 583089\H, 0, -2. 337359, 3. 112487, 1. 176736\C, 0, -  
1. 73317, 1. 003062, 1. 32201\H, 0, -0. 891302, 1. 372974, 1. 912668\H, 0, -2. 462199  
, 0. 490054, 1. 952477\O, 0, -3. 673539, 1. 93666, 0. 123455\H, 0, 0. 311871, -0. 2851

4, 2. 409961\0, 0, 1. 367516, 0. 825492, 1. 139503\0, 0, 2. 908524, 0. 112768, -0. 925  
503\0, 0, 3. 033748, -0. 957177, 2. 165645\H, 0, 3. 725743, -1. 619735, 2. 002257\H,  
0, 7. 109538, 3. 838598, -1. 572776\H, 0, 1. 950703, 6. 014406, 0. 521193\p, 0, -4. 89  
552, 1. 826493, 1. 134073\0, 0, -4. 962044, 0. 664535, 2. 044818\0, 0, -4. 822293, 3.  
211799, 1. 940957\0, 0, -6. 143599, 2. 009751, 0. 170932\C, 0, -6. 115296, 1. 889068  
, -1. 257952\H, 0, -5. 182352, 2. 301216, -1. 648217\H, 0, -6. 959849, 2. 478895, -1.  
620492\C, 0, -6. 275018, 0. 448502, -1. 681218\H, 0, -6. 407445, 0. 412928, -2. 7723  
12\0, 0, -5. 114917, -0. 275087, -1. 299911\C, 0, -7. 488268, -0. 283003, -1. 049084  
\C, 0, -5. 549576, -1. 613981, -1. 074104\H, 0, -8. 066713, 0. 387396, -0. 40179\C, 0  
, -6. 824848, -1. 415232, -0. 259183\0, 0, -8. 268812, -0. 755876, -2. 130187\H, 0, -  
5. 767041, -2. 107228, -2. 025932\N, 0, -4. 482094, -2. 361306, -0. 461288\H, 0, -6.  
579533, -1. 069074, 0. 749636\H, 0, -7. 445877, -2. 312125, -0. 204617\H, 0, -9. 046  
63, -1. 199517, -1. 774383\C, 0, -4. 022082, -2. 008165, 0. 792805\C, 0, -3. 828629,  
-3. 321307, -1. 240775\H, 0, -4. 57825, -1. 217225, 1. 286585\C, 0, -2. 94075, -2. 56  
2916, 1. 372912\N, 0, -2. 76372, -3. 917814, -0. 598162\0, 0, -4. 177964, -3. 630821  
, -2. 358694\C, 0, -2. 460068, -2. 185526, 2. 740108\C, 0, -2. 186181, -3. 558439, 0.  
61564\H, 0, -2. 216331, -4. 538028, -1. 182343\H, 0, -2. 356806, -3. 072295, 3. 3723  
88\H, 0, -1. 472621, -1. 715437, 2. 686718\H, 0, -3. 158183, -1. 489223, 3. 211627\0  
, 0, -1. 137014, -4. 067668, 0. 975263\H, 0, 5. 518306, -3. 536346, -2. 060787\H, 0, 1  
. 427944, -2. 972763, -1. 3569\H, 0, -5. 000425, 3. 069176, 2. 87963\\Version=EM64  
L-G09RevA.01\State=2-A\HF=-3833.219229\S2=0.754502\S2-1=0.\S2A=0.75001  
6\RMSD=3.574e-09\Dipole=-2.6781501,5.640403,1.1646928\Quadrupole=29.43  
95839,-7.3076759,-22.131908,25.7307119,-14.4271571,-22.186302\PG=C01 [X  
(C30H41N6O22P2)]\@\

**A-TS6:**

0, 0, 6. 539455, 3. 220278, -1. 105067\C, 0, 5. 6  
35386, 3. 42529, -2. 174179\H, 0, 5. 398539, 4. 49258, -2. 2993\H, 0, 6. 03325, 3. 040  
404, -3. 121722\C, 0, 4. 356349, 2. 676, -1. 859026\H, 0, 3. 572597, 2. 974069, -2. 56  
5412\0, 0, 4. 594443, 1. 279286, -1. 970124\C, 0, 4. 113604, 0. 633025, -0. 813113\H  
, 0, 1. 960607, 0. 56587, 0. 202967\N, 0, 5. 220288, -0. 596783, -0. 58627\C, 0, 5. 555  
051, -0. 930118, 0. 650911\H, 0, 5. 396413, -0. 173542, 1. 412296\C, 0, 6. 064589, -2  
. 172489, 1. 00791\C, 0, 6. 411282, -2. 548551, 2. 400202\H, 0, 5. 838537, -3. 439149  
, 2. 683412\H, 0, 7. 465203, -2. 837837, 2. 466337\H, 0, 6. 206123, -1. 739487, 3. 102  
734\C, 0, 6. 271909, -3. 180545, -0. 046739\0, 0, 6. 719641, -4. 286653, 0. 169112\N  
, 0, 5. 947362, -2. 739367, -1. 314991\C, 0, 5. 307616, -1. 556637, -1. 654932\0, 0, 4  
. 919536, -1. 33082, -2. 763958\C, 0, 3. 870468, 2. 924205, -0. 418635\H, 0, 4. 28913  
1, 3. 841735, 0. 003811\C, 0, 4. 318817, 1. 669327, 0. 308666\H, 0, 5. 382805, 1. 7900  
88, 0. 527181\H, 0, 3. 729632, 1. 457283, 1. 203502\0, 0, 2. 431814, 2. 993481, -0. 43  
6432\p, 0, 1. 722209, 3. 807179, 0. 739227\0, 0, 1. 802709, 5. 30893, 0. 139992\0, 0,  
2. 257342, 3. 701127, 2. 100267\0, 0, 0. 198636, 3. 385937, 0. 577063\C, 0, -0. 44409  
6, 3. 383697, -0. 704149\H, 0, -0. 946299, 4. 347121, -0. 841813\H, 0, 0. 288821, 3. 2  
28329, -1. 500064\C, 0, -1. 441082, 2. 241996, -0. 725514\H, 0, -2. 12599, 2. 382599

, -1. 573514\0, 0, -0. 735743, 1. 027451, -0. 85364\C, 0, -1. 215559, 0. 084485, 0. 103764\H, 0, -2. 063778, -0. 458701, -0. 324232\N, 0, -0. 173588, -0. 884537, 0. 383815\C, 0, 0. 860522, -0. 497965, 1. 361188\C, 0, 1. 84465, -1. 669973, 1. 576783\C, 0, 1. 208266, -2. 753315, 2. 456281\H, 0, 0. 311225, -3. 180579, 1. 999272\H, 0, 1. 932548, -3. 559599, 2. 609532\H, 0, 0. 963727, -2. 315856, 3. 428448\C, 0, 2. 251928, -2. 356038, 0. 282831\0, 0, 3. 344757, -2. 892262, 0. 16875\N, 0, 1. 269261, -2. 455832, -0. 647507\C, 0, 0. 060886, -1. 748572, -0. 670479\0, 0, -0. 717657, -1. 928886, -1. 582634\C, 0, -2. 271323, 2. 143215, 0. 57044\H, 0, -2. 245536, 3. 06054, 1. 163305\C, 0, -1. 656436, 0. 946705, 1. 283655\H, 0, -0. 782804, 1. 315673, 1. 825899\H, 0, -2. 357164, 0. 443899, 1. 954188\0, 0, -3. 637337, 1. 899497, 0. 165891\H, 0, 0. 352852, -0. 353382, 2. 322079\0, 0, 1. 449685, 0. 703527, 1. 044248\0, 0, 3. 01985, -0. 009247, -0. 904718\0, 0, 3. 003897, -1. 154845, 2. 18933\H, 0, 3. 639242, -1. 883582, 2. 125958\H, 0, 7. 389371, 3. 604427, -1. 340313\H, 0, 1. 836903, 5. 947257, 0. 864049\p, 0, -4. 813113, 1. 807827, 1. 228573\0, 0, -4. 895049, 0. 621973, 2. 10737\0, 0, -4. 64629, 3. 160779, 2. 077487\0, 0, -6. 100572, 2. 074269, 0. 337006\C, 0, -6. 137122, 2. 035654, -1. 095427\H, 0, -5. 208012, 2. 439449, -1. 503395\H, 0, -6. 97657, 2. 669895, -1. 388395\C, 0, -6. 360954, 0. 624988, -1. 587523\H, 0, -6. 54069, 0. 650743, -2. 672096\0, 0, -5. 208661, -0. 148742, -1. 29357\C, 0, -7. 567613, -0. 1028, -0. 938934\C, 0, -5. 668491, -1. 482511, -1. 092987\H, 0, -8. 103872, 0. 554578, -0. 243526\C, 0, -6. 904487, -1. 282011, -0. 220224\0, 0, -8. 400946, -0. 513486, -2. 006407\H, 0, -5. 936887, -1. 93715, -2. 051069\N, 0, -4. 596189, -2. 276882, -0. 549504\H, 0, -6. 613236, -0. 980715, 0. 790491\H, 0, -7. 547531, -2. 16387, -0. 174475\H, 0, -9. 173366, -0. 955837, -1. 637473\C, 0, -4. 106118, -2. 013124, 0. 715361\C, 0, -3. 951004, -3. 16901, -1. 412946\H, 0, -4. 64364, -1. 255244, 1. 275663\C, 0, -3. 013695, -2. 607283, 1. 23241\N, 0, -2. 872044, -3. 807165, -0. 837997\0, 0, -4. 318282, -3. 391431, -2. 545963\C, 0, -2. 495387, -2. 309377, 2. 605444\C, 0, -2. 280738, -3. 553364, 0. 395642\H, 0, -2. 325996, -4. 368502, -1. 480003\H, 0, -2. 373931, -3. 230294, 3. 183513\H, 0, -1. 510078, -1. 83484, 2. 54769\H, 0, -3. 178488, -1. 639486, 3. 133796\0, 0, -1. 238803, -4. 108755, 0. 705311\H, 0, 6. 002882, -3. 421235, -2. 062537\H, 0, 1. 457789, -2. 982166, -1. 491253\H, 0, -4. 759109, 2. 982696, 3. 020015\\Version=EM64L-G09RevA. 01\State=2-A\HF=-3833. 2097611\S2=0. 770947\S2-1=0. \S2A=0. 750247\RMSD=4. 597e-09\Dipole=0. 5672354, 3. 2408262, 2. 5787109\Quadrupole=57. 5286875, -17. 7249808, -39. 8037067, 0. 6968265, -6. 0003381, -20. 9441716\PG=C01 [X(C30H41N6O22P2)]\ \@

**A-I6:**

0, 0, 6. 792403, 2. 790395, -0. 763286\C, 0, 6. 011579, 3. 232433, -1. 840501\H, 0, 6. 021489, 4. 329121, -1. 833908\H, 0, 6. 401956, 2. 894042, -2. 808849\C, 0, 4. 562639, 2. 770941, -1. 724305\H, 0, 3. 917123, 3. 307145, -2. 425289\0, 0, 4. 478016, 1. 372535, -2. 050872\C, 0, 4. 378565, 0. 622888, -0. 944171\H, 0, 1. 031745, 0. 886656, -0. 911645\N, 0, 6. 792996, -0. 457693, 0. 702031\C, 0, 6. 187011, -1. 372843, 1. 409537\H, 0, 5. 909157, -1. 098498, 2. 427274\C, 0, 5. 856575, -2. 675309, 0. 959795\C, 0, 5. 109171, -3. 660648, 1. 767322\H

, 0, 4. 141693, -3. 831505, 1. 278567\H, 0, 5. 637105, -4. 618952, 1. 780262\H, 0, 4. 9  
4217, -3. 297826, 2. 78218\C, 0, 6. 31026, -3. 063658, -0. 385212\O, 0, 6. 154819, -4  
. 168799, -0. 861307\N, 0, 6. 973425, -2. 050108, -1. 068379\C, 0, 7. 092826, -0. 745  
973, -0. 63623\O, 0, 7. 467035, 0. 131064, -1. 399739\C, 0, 4. 03713, 2. 874271, -0. 2  
87339\H, 0, 4. 510257, 3. 694326, 0. 258557\C, 0, 4. 332354, 1. 501149, 0. 283589\H,  
0, 5. 329303, 1. 489894, 0. 732019\H, 0, 3. 599472, 1. 139107, 1. 004706\O, 0, 2. 6061  
79, 3. 101565, -0. 364525\P, 0, 1. 835007, 3. 408998, 0. 994797\O, 0, 1. 823381, 5. 01  
7111, 1. 013495\O, 0, 2. 30593, 2. 787158, 2. 236632\O, 0, 0. 342487, 2. 983568, 0. 62  
6421\C, 0, -0. 3222, 3. 438984, -0. 554707\H, 0, -0. 672941, 4. 465878, -0. 406511\H  
, 0, 0. 361816, 3. 40426, -1. 408983\C, 0, -1. 475756, 2. 481599, -0. 779824\H, 0, -2.  
081351, 2. 829868, -1. 624958\O, 0, -0. 93964, 1. 199587, -1. 055986\C, 0, -1. 46212  
3, 0. 213122, -0. 134204\H, 0, -2. 322927, -0. 277835, -0. 594374\N, 0, -0. 456453, -  
0. 800526, 0. 079269\C, 0, 0. 8719, -0. 376608, 0. 532212\C, 0, 1. 697108, -1. 582128  
, 1. 020626\C, 0, 1. 084581, -2. 229916, 2. 258138\H, 0, 0. 113089, -2. 683335, 2. 049  
674\H, 0, 1. 769111, -3. 007517, 2. 604447\H, 0, 0. 989928, -1. 476796, 3. 04633\C, 0  
, 1. 734086, -2. 617593, -0. 102105\O, 0, 2. 682319, -3. 333447, -0. 328051\N, 0, 0. 5  
61667, -2. 722172, -0. 822616\C, 0, -0. 54689, -1. 892188, -0. 784158\O, 0, -1. 5239  
17, -2. 139442, -1. 461952\C, 0, -2. 374377, 2. 317826, 0. 45782\H, 0, -2. 334612, 3.  
181583, 1. 128207\C, 0, -1. 886657, 1. 020752, 1. 088643\H, 0, -1. 041523, 1. 240607  
, 1. 743657\H, 0, -2. 675478, 0. 525726, 1. 655129\O, 0, -3. 718061, 2. 180743, -0. 04  
525\H, 0, 0. 741086, 0. 317941, 1. 372196\O, 0, 1. 608401, 0. 224547, -0. 502145\O, 0  
, 4. 366668, -0. 586031, -0. 999729\O, 0, 2. 999523, -1. 18679, 1. 341045\H, 0, 3. 496  
793, -1. 083539, 0. 503788\H, 0, 7. 132158, 1. 895059, -0. 948644\H, 0, 1. 868242, 5.  
344722, 1. 921758\P, 0, -4. 967743, 2. 16256, 0. 942196\O, 0, -5. 087843, 1. 056063,  
1. 91353\O, 0, -4. 861457, 3. 58498, 1. 676826\O, 0, -6. 177692, 2. 347359, -0. 06456  
9\C, 0, -6. 137619, 2. 044062, -1. 466814\H, 0, -5. 17753, 2. 353624, -1. 885219\H, 0  
, -6. 94142, 2. 631517, -1. 915262\C, 0, -6. 379498, 0. 576054, -1. 71949\H, 0, -6. 51  
3751, 0. 425018, -2. 800695\O, 0, -5. 266845, -0. 172494, -1. 254073\C, 0, -7. 63672  
6, -0. 005595, -1. 019855\C, 0, -5. 789657, -1. 46165, -0. 931408\H, 0, -8. 154138, 0  
. 759592, -0. 428253\C, 0, -7. 050157, -1. 115104, -0. 14173\O, 0, -8. 464339, -0. 50  
3348, -2. 053367\H, 0, -6. 039824, -2. 008589, -1. 845159\N, 0, -4. 780261, -2. 2347  
98, -0. 256706\H, 0, -6. 777847, -0. 714086, 0. 839934\H, 0, -7. 730134, -1. 961565,  
-0. 023091\H, 0, -9. 271145, -0. 851318, -1. 657797\C, 0, -4. 23783, -1. 773322, 0. 9  
273\C, 0, -4. 287065, -3. 374589, -0. 897819\H, 0, -4. 703244, -0. 877435, 1. 3289\C  
, 0, -3. 189485, -2. 355071, 1. 540286\N, 0, -3. 282459, -4. 008215, -0. 194881\O, 0,  
-4. 722624, -3. 798077, -1. 946144\C, 0, -2. 602747, -1. 856811, 2. 825712\C, 0, -2.  
576627, -3. 51641, 0. 899193\H, 0, -2. 843907, -4. 770477, -0. 696832\H, 0, -2. 4763  
89, -2. 680163, 3. 534018\H, 0, -1. 611578, -1. 420585, 2. 660416\H, 0, -3. 2499, -1.  
097659, 3. 27282\O, 0, -1. 543942, -4. 054006, 1. 263947\H, 0, 7. 188914, -2. 224734  
, -2. 042894\H, 0, 0. 500932, -3. 476925, -1. 494466\H, 0, -5. 083875, 3. 498963, 2. 6  
13053\\Version=EM64L-G09RevA. 01\State=2-A\HF=-3833. 2718212\S2=0. 770743  
\S2-1=0. \S2A=0. 750264\RMSD=2. 982e-09\Dipole=-4. 126652, 5. 3121991, 2. 1067  
913\Quadrupole=4. 6606032, 1. 2783226, -5. 9389258, -10. 9127847, -4. 4639278, -  
15. 2314059\PG=C01 [X(C30H41N6O22P2)]\@



A-TS7:

C, 0, -0.521177, 1.37917, 1.13886\N, 0, 0.037156, 1.200483, -0.183242\C, 0, 0.691319, 2.201757, -0.878852\N, 0, 0.906745, 3.376544, -0.186349\C, 0, 0.583053, 3.626248, 1.140206\C, 0, 0.325506, 2.363962, 1.965913\C, 0, 0.069291, -0.112647, -0.766033\0, 0, -1.175565, -0.788055, -0.647445\C, 0, -0.901948, -2.062425, -1.212818\C, 0, 0.565122, -2.395785, -0.811144\C, 0, 1.026308, -1.115376, -0.12625\C, 0, -1.962384, -3.06575, -0.822446\0, 0, -2.135092, -3.066066, 0.596563\P, 0, -3.541495, -3.51203, 1.212775\0, 0, -3.640452, -3.3522, 2.665419\0, 0, 1.275415, -2.594498, -2.0567\0, 0, 1.054565, 2.079799, -2.039894\0, 0, 0.578415, 4.739176, 1.600735\C, 0, 1.667232, 1.720629, 2.314171\0, 0, -0.320448, 2.681314, 3.156659\0, 0, -4.661917, -2.722894, 0.366802\C, 0, -5.051582, -1.406866, 0.829815\C, 0, -6.157623, -0.904456, -0.112195\0, 0, -5.510303, -0.125096, -1.117544\C, 0, -4.110935, -0.13916, -0.905764\C, 0, -3.9359, -0.411884, 0.588318\C, 0, -7.186623, -0.034926, 0.584723\N, 0, -3.541783, 1.133788, -1.328647\C, 0, -2.538065, 1.123894, -2.304685\N, 0, -1.879242, 2.328111, -2.439432\C, 0, -2.047767, 3.486143, -1.69012\C, 0, -3.139108, 3.417111, -0.683872\C, 0, -3.928498, 2.273998, -0.689141\0, 0, -2.265073, 0.156931, -2.984404\0, 0, -1.346853, 4.457843, -1.872054\C, 0, -3.648659, 4.731907, -0.177766\0, 0, -3.68829, -4.985887, 0.607194\H, 0, -4.822981, 2.17989, -0.078398\H, 0, -1.078803, 2.316062, -3.065176\H, 0, -4.351015, 4.575736, 0.642142\H, 0, -4.140812, 5.287186, -0.980889\H, 0, -2.803499, 5.324959, 0.176243\H, 0, -3.633883, -0.890441, -1.535865\H, 0, -4.136065, 0.494942, 1.160711\H, 0, -2.941522, -0.776003, 0.840024\H, 0, -5.366967, -1.47621, 1.873566\H, 0, -6.659575, -1.759639, -0.579957\H, 0, -7.863789, 0.376148, -0.175194\H, 0, 1.104285, 4.180589, -0.77123\H, 0, 2.187739, 1.371171, 1.41597\H, 0, 1.485617, 0.876495, 2.987049\H, 0, 2.297233, 2.450525, 2.82804\H, 0, 0.292267, 0.027676, -1.829117\H, 0, 0.834705, -1.171478, 0.950565\H, 0, 2.075219, -0.866371, -0.285322\H, 0, 0.666431, -3.295109, -0.198414\H, 0, -0.920685, -1.976127, -2.309981\H, 0, -2.908376, -2.816927, -1.311897\H, 0, -1.65549, -4.064338, -1.152374\H, 0, -7.771275, -0.658713, 1.275543\H, 0, -1.019007, 3.317969, 2.946966\H, 0, -4.339525, -5.514515, 1.08584\H, 0, -0.541147, 0.40682, 1.641542\0, 0, -1.889657, 1.74173, 1.125079\0, 0, -2.009125, 3.103536, 0.845737\0, 0, -6.496881, 0.992568, 1.272168\H, 0, -7.13379, 1.532873, 1.750579\P, 0, 2.838057, -2.955756, -2.016901\0, 0, 3.240722, -3.827921, -0.904948\0, 0, 3.082503, -3.475478, -3.505692\0, 0, 3.636319, -1.579491, -2.025376\C, 0, 3.205546, -0.398826, -2.721632\H, 0, 2.127156, -0.270394, -2.613109\H, 0, 3.452539, -0.493479, -3.784067\C, 0, 3.923254, 0.784472, -2.10353\H, 0, 3.559446, 1.698402, -2.584887\0, 0, 3.623097, 0.829841, -0.706948\C, 0, 5.456133, 0.721879, -2.217583\C, 0, 4.833122, 0.854355, 0.051223\H, 0, 5.773087, 0.066252, -3.039578\C, 0, 5.872517, 0.19412, -0.849089\0, 0, 5.886561, 2.053688, -2.419366\H, 0, 5.105708, 1.882973, 0.293263\N, 0, 4.602541, 0.185655, 1.316142\H, 0, 5.776175, -0.894282, -0.817669\H, 0, 6.89206, 0.473233, -0.572532\H, 0, 6.85025, 2.07119, -2.408705\C, 0, 4.131347, -1.119744, 1.331406\C, 0, 4.69

9913, 0.941165, 2.483137\H, 0, 4.090237, -1.604135, 0.35984\C, 0, 3.733124, -1.759993, 2.445571\N, 0, 4.332658, 0.251532, 3.619163\O, 0, 5.073817, 2.096228, 2.511056\C, 0, 3.202227, -3.160205, 2.460315\C, 0, 3.818828, -1.046934, 3.72349\H, 0, 4.395762, 0.780665, 4.480513\H, 0, 3.810402, -3.790226, 3.115488\H, 0, 2.187353, -3.174299, 2.870441\H, 0, 3.196582, -3.58477, 1.453735\O, 0, 3.490225, -1.496306, 4.801684\H, 0, 2.815708, -4.39542, -3.630405\\Version=EM64L-G09RevA.01\State=2-A\HF=-3833.127487\S2=0.771324\S2-1=0.\S2A=0.750139\RMSD=1.882e-09\Dipole=-2.7611975, -2.9383211, -3.8653343\Quadrupole=65.1867332, -25.2359501, -39.9507832, -5.6007797, -28.8381009, 13.5268453\PG=C01 [X(C30H41N6O22P2)]\@\

A-I7:

C, 0, -0.575539, 1.409227, 1.093759\N, 0, 0.051498, 1.242128, -0.201068\C, 0, 0.747155, 2.24182, -0.854235\N, 0, 0.94875, 3.408728, -0.127894\C, 0, 0.572421, 3.622641, 1.177909\C, 0, 0.260316, 2.355806, 1.969388\C, 0, 0.07792, -0.06155, -0.810383\O, 0, -1.174178, -0.723613, -0.721621\C, 0, -0.906729, -1.999503, -1.290999\C, 0, 0.556157, -2.344487, -0.884755\C, 0, 1.014254, -1.081498, -0.16815\C, 0, -1.968271, -2.999816, -0.897847\O, 0, -2.108402, -3.025172, 0.524398\P, 0, -3.496723, -3.496257, 1.165709\O, 0, -3.556645, -3.365247, 2.623501\O, 0, 1.281549, -2.514046, -2.126376\O, 0, 1.156531, 2.138411, -1.99723\O, 0, 0.554714, 4.71724, 1.693174\C, 0, 1.584617, 1.671133, 2.33588\O, 0, -0.451486, 2.686027, 3.117925\O, 0, -4.647846, -2.708125, 0.364371\C, 0, -5.036891, -1.399512, 0.854653\C, 0, -6.169179, -0.891057, -0.054\O, 0, -5.555242, -0.08425, -1.055652\C, 0, -4.146911, -0.113873, -0.890496\C, 0, -3.934602, -0.394566, 0.596658\C, 0, -7.189827, -0.047696, 0.68633\N, 0, -3.570095, 1.139258, -1.338801\C, 0, -2.624589, 1.09412, -2.344888\N, 0, -1.914284, 2.28185, -2.515446\C, 0, -1.909681, 3.395388, -1.704557\C, 0, -2.862043, 3.358131, -0.505658\C, 0, -3.888297, 2.307334, -0.667638\O, 0, -2.393747, 0.129694, -3.047964\O, 0, -1.167419, 4.329701, -1.91484\C, 0, -3.446507, 4.742553, -0.274793\O, 0, -3.637274, -4.960589, 0.534411\H, 0, -4.7652, 2.259362, -0.032478\H, 0, -1.195045, 2.249937, -3.230914\H, 0, -4.09843, 4.716361, 0.600074\H, 0, -4.017874, 5.057439, -1.150168\H, 0, -2.633199, 5.4505, -0.108825\H, 0, -3.707476, -0.880257, -1.530075\H, 0, -4.130693, 0.505984, 1.179371\H, 0, -2.933334, -0.757973, 0.821472\H, 0, -5.326291, -1.486707, 1.904437\H, 0, -6.673317, -1.744018, -0.524621\H, 0, -7.880338, 0.382292, -0.05089\H, 0, 1.1726, 4.220689, -0.69198\H, 0, 2.131545, 1.330126, 1.449781\H, 0, 1.364106, 0.817211, 2.984014\H, 0, 2.214509, 2.373624, 2.887638\H, 0, 0.322172, 0.095829, -1.866572\H, 0, 0.795985, -1.153961, 0.902996\H, 0, 2.068782, -0.839784, -0.29842\H, 0, 0.6497, -3.258024, -0.292301\H, 0, -0.928096, -1.909947, -2.38739\H, 0, -2.92158, -2.734146, -1.362746\H, 0, -1.67564, -3.994208, -1.252802\H, 0, -7.761514, -0.694947, 1.367026\H, 0, -0.467841, 3.65534, 3.163571\H, 0, -4.304416, -5.492278, 0.986955\H, 0, -0.640833, 0.427507, 1.57537\O, 0, -1.932589, 1.76843, 0.993333\O, 0, -2.026517, 3.1591, 0.685824\O, 0, -6.492772, 0.960389, 1.393217\H, 0, -7.126734, 1.501043, 1

. 874792\P, 0, 2. 837745, -2. 90015, -2. 072764\O, 0, 3. 208692, -3. 812914, -0. 9825  
98\O, 0, 3. 100242, -3. 37237, -3. 57397\O, 0, 3. 65826, -1. 53745, -2. 021875\C, 0, 3  
. 266974, -0. 333536, -2. 701103\H, 0, 2. 18761, -0. 190473, -2. 622309\H, 0, 3. 5450  
23, -0. 405999, -3. 757603\C, 0, 3. 984024, 0. 823145, -2. 032945\H, 0, 3. 649482, 1.  
753711, -2. 503351\O, 0, 3. 642277, 0. 841437, -0. 645199\C, 0, 5. 51828, 0. 739059,  
-2. 101779\C, 0, 4. 828371, 0. 820998, 0. 150069\H, 0, 5. 850508, 0. 101602, -2. 9318  
81\C, 0, 5. 884127, 0. 167497, -0. 73636\O, 0, 5. 974848, 2. 069053, -2. 252202\H, 0,  
5. 111231, 1. 837292, 0. 429243\N, 0, 4. 547686, 0. 121439, 1. 387847\H, 0, 5. 770512  
, -0. 919554, -0. 738139\H, 0, 6. 898918, 0. 422456, -0. 421522\H, 0, 6. 938253, 2. 06  
9392, -2. 221251\C, 0, 4. 073859, -1. 183133, 1. 352215\C, 0, 4. 607136, 0. 844904, 2  
. 576968\H, 0, 4. 060453, -1. 640384, 0. 366729\C, 0, 3. 641691, -1. 853747, 2. 43540  
6\N, 0, 4. 2049, 0. 124855, 3. 681557\O, 0, 4. 978214, 1. 999361, 2. 648293\C, 0, 3. 10  
8914, -3. 252787, 2. 394763\C, 0, 3. 69084, -1. 177285, 3. 734909\H, 0, 4. 245134, 0.  
628398, 4. 559425\H, 0, 3. 693868, -3. 900599, 3. 053745\H, 0, 2. 080437, -3. 276034  
, 2. 768989\H, 0, 3. 137202, -3. 650466, 1. 377722\O, 0, 3. 333145, -1. 65636, 4. 7906  
84\H, 0, 2. 802553, -4. 275955, -3. 74142\\Version=EM64L-G09RevA. 01\State=2-A  
\HF=-3833. 1415634\S2=0. 756471\S2-1=0. \S2A=0. 750031\RMSD=1. 247e-09\Dipo  
le=-1. 5708958, -2. 1113567, -3. 3438448\Quadrupole=56. 3763116, -19. 1258356,  
-37. 2504759, -2. 0132048, -28. 2263134, 17. 5763965\PG=C01 [X(C30H41N6O22P2)  
]\@

#### A-TS8:

C, 0, 0. 803176, -1. 497615, 1. 074468\N, 0, 0. 229711, -1  
. 350481, -0. 243419\C, 0, 0. 04995, -2. 406682, -1. 11983\N, 0, 0. 404913, -3. 65875  
5, -0. 630649\C, 0, 0. 827137, -3. 959024, 0. 652746\C, 0, 0. 494526, -2. 879781, 1. 6  
81455\C, 0, -0. 08903, -0. 024836, -0. 713764\O, 0, 1. 012272, 0. 847936, -0. 474636  
\C, 0, 0. 48503, 2. 120858, -0. 775398\C, 0, -0. 832173, 2. 150588, 0. 012407\C, 0, -1  
. 275599, 0. 67577, -0. 016489\C, 0, 1. 468785, 3. 230657, -0. 499613\O, 0, 1. 878819  
, 3. 193173, 0. 869519\P, 0, 3. 278803, 3. 83834, 1. 291475\O, 0, 3. 576494, 3. 735726  
, 2. 721984\O, 0, -1. 712143, 3. 059987, -0. 671759\O, 0, -0. 373906, -2. 276513, -2.  
251002\O, 0, 1. 352455, -5. 010206, 0. 930726\C, 0, -0. 985585, -2. 968049, 2. 05194  
4\O, 0, 1. 226726, -3. 071266, 2. 848518\O, 0, 4. 385679, 3. 188685, 0. 321691\C, 0, 4  
. 987644, 1. 935672, 0. 734071\C, 0, 6. 02152, 1. 564158, -0. 337926\O, 0, 5. 339826,  
0. 738514, -1. 276922\C, 0, 3. 981482, 0. 58005, -0. 882887\C, 0, 3. 974458, 0. 81436  
6, 0. 624065\C, 0, 7. 210894, 0. 800378, 0. 213736\N, 0, 3. 526721, -0. 725151, -1. 33  
0447\C, 0, 2. 654613, -0. 775424, -2. 422887\N, 0, 2. 39084, -2. 050716, -2. 880614\  
C, 0, 2. 860645, -3. 258986, -2. 377292\C, 0, 3. 84246, -3. 126178, -1. 311196\C, 0, 4  
. 051571, -1. 855606, -0. 752589\O, 0, 2. 166894, 0. 204217, -2. 945688\O, 0, 2. 4551  
43, -4. 322575, -2. 816159\C, 0, 4. 386258, -4. 360772, -0. 687791\O, 0, 3. 137434, 5  
. 298482, 0. 649345\H, 0, 4. 923927, -1. 664281, -0. 134075\H, 0, 1. 636421, -2. 1097  
77, -3. 556691\H, 0, 5. 275121, -4. 14842, -0. 091136\H, 0, 4. 618459, -5. 101073, -1  
. 456725\H, 0, 3. 621691, -4. 804321, -0. 034356\H, 0, 3. 348439, 1. 295051, -1. 4074  
04\H, 0, 4. 348621, -0. 058519, 1. 160773\H, 0, 2. 985281, 1. 06327, 1. 00068\H, 0, 5.

41379, 2. 057831, 1. 732492\H, 0, 6. 376988, 2. 473691, -0. 837472\H, 0, 7. 830578, 0  
. 473688, -0. 631601\H, 0, 0. 530776, -4. 370401, -1. 345183\H, 0, -1. 634795, -2. 68  
8146, 1. 216811\H, 0, -1. 172848, -2. 305669, 2. 900884\H, 0, -1. 221186, -3. 986111  
, 2. 368541\H, 0, -0. 257553, -0. 107304, -1. 792086\H, 0, -1. 420955, 0. 287145, 0. 9  
95388\H, 0, -2. 209359, 0. 519115, -0. 566701\H, 0, -0. 678624, 2. 511785, 1. 032802  
\H, 0, 0. 234696, 2. 179128, -1. 848891\H, 0, 2. 336179, 3. 131468, -1. 159753\H, 0, 0  
. 982911, 4. 190909, -0. 704115\H, 0, 7. 80707, 1. 474559, 0. 845183\H, 0, 2. 126354,  
-3. 319484, 2. 59069\H, 0, 3. 835395, 5. 898336, 0. 941899\H, 0, 0. 385451, -0. 71998  
3, 1. 723075\O, 0, 2. 191462, -1. 205419, 1. 119324\O, 0, 2. 953807, -2. 303114, 0. 78  
6348\O, 0, 6. 722827, -0. 303446, 0. 953877\H, 0, 7. 469204, -0. 790263, 1. 3176\O, 0  
, -3. 137211, 3. 381852, -0. 01371\O, 0, -3. 19374, 3. 234663, 1. 44638\O, 0, -3. 4833  
53, 4. 810437, -0. 635035\O, 0, -4. 178334, 2. 445625, -0. 768189\C, 0, -4. 060969, 2  
. 093652, -2. 15313\H, 0, -3. 01924, 1. 850401, -2. 382947\H, 0, -4. 383159, 2. 93636  
7, -2. 773813\C, 0, -4. 943022, 0. 882525, -2. 371523\H, 0, -4. 87693, 0. 576678, -3.  
422459\O, 0, -4. 476195, -0. 163893, -1. 527538\C, 0, -6. 426207, 1. 108332, -2. 025  
153\C, 0, -5. 547767, -0. 668572, -0. 737526\H, 0, -6. 685602, 2. 175303, -2. 034624  
\C, 0, -6. 54222, 0. 486348, -0. 638293\O, 0, -7. 163583, 0. 385076, -2. 991289\H, 0,  
-5. 992077, -1. 546116, -1. 210837\N, 0, -5. 017851, -1. 115357, 0. 536362\H, 0, -6.  
223784, 1. 199675, 0. 126654\H, 0, -7. 552681, 0. 140258, -0. 407599\H, 0, -8. 09825  
, 0. 427063, -2. 759358\C, 0, -4. 291205, -0. 239587, 1. 325753\C, 0, -5. 2283, -2. 44  
0542, 0. 909873\H, 0, -4. 185946, 0. 761073, 0. 916576\C, 0, -3. 738072, -0. 577411,  
2. 505839\N, 0, -4. 654063, -2. 766686, 2. 122573\O, 0, -5. 863275, -3. 236442, 0. 25  
0069\C, 0, -2. 946744, 0. 367771, 3. 356755\C, 0, -3. 922, -1. 947373, 2. 988554\H, 0  
, -4. 80556, -3. 721116, 2. 42595\H, 0, -2. 908355, 1. 361613, 2. 903579\H, 0, -3. 388  
951, 0. 443883, 4. 353933\H, 0, -1. 926356, -0. 006206, 3. 502095\O, 0, -3. 485524, -  
2. 387469, 4. 033944\H, 0, -3. 116743, 5. 540473, -0. 11925\\Version=EM64L-G09Re  
vA.01\State=2-A\HF=-3833.126377\S2=0.782278\S2-1=0. \S2A=0.750312\RMSD=  
5.673e-09\Dipole=1.3041702, 5.0644669, -2.0669622\Quadrupole=66.4403312,  
-14.866707, -51.5736242, -16.5099961, 11.4329982, -11.7743595\PG=C01 [X(C3  
OH41N6022P2)]\@

A-I8:

C, 0, 0. 774028, -1. 479838, 1. 090161\N, 0, 0. 217742, -1  
. 301745, -0. 235775\C, 0, 0. 000514, -2. 34675, -1. 118878\N, 0, 0. 22034, -3. 62592  
, -0. 608881\C, 0, 0. 528376, -3. 938929, 0. 692079\C, 0, 0. 295422, -2. 812772, 1. 69  
5093\C, 0, -0. 080252, 0. 026608, -0. 712128\O, 0, 1. 021957, 0. 895765, -0. 488626\  
C, 0, 0. 506758, 2. 156239, -0. 855876\C, 0, -0. 840281, 2. 22741, -0. 116929\C, 0, -1  
. 253962, 0. 746942, -0. 019619\C, 0, 1. 4892, 3. 269478, -0. 596911\O, 0, 1. 838081,  
3. 302473, 0. 78918\O, 0, 3. 247014, 3. 919904, 1. 224693\O, 0, 3. 495867, 3. 879077,  
2. 66781\O, 0, -1. 713185, 3. 040892, -0. 923304\O, 0, -0. 3677, -2. 200724, -2. 2657  
44\O, 0, 0. 887569, -5. 040335, 1. 046123\C, 0, -1. 204237, -2. 728168, 2. 011101\O,  
0, 1. 017638, -3. 075764, 2. 85556\O, 0, 4. 354624, 3. 18439, 0. 321861\C, 0, 4. 89579  
8, 1. 933626, 0. 818176\C, 0, 5. 977275, 1. 477058, -0. 173541\O, 0, 5. 343166, 0. 581

731, -1.076935\C, 0, 3.948938, 0.497275, -0.776898\C, 0, 3.861825, 0.830987, 0.711491\C, 0, 7.128745, 0.755019, 0.501776\N, 0, 3.469946, -0.799514, -1.190555\C, 0, 2.691372, -0.891104, -2.329832\N, 0, 2.494932, -2.189296, -2.789153\C, 0, 3.171759, -3.340723, -2.406771\C, 0, 4.061319, -3.170073, -1.265671\C, 0, 3.809348, -1.959589, -0.424177\0, 0, 2.203007, 0.055609, -2.913585\0, 0, 2.995192, -4.401889, -2.982359\C, 0, 4.839254, -4.318078, -0.746187\0, 0, 3.176207, 5.351481, 0.51053\H, 0, 4.667452, -1.708209, 0.207606\H, 0, 1.813089, -2.277796, -3.533077\H, 0, 5.813965, -3.993311, -0.369526\H, 0, 4.966478, -5.071979, -1.523451\H, 0, 4.300356, -4.779706, 0.093148\H, 0, 3.390661, 1.217732, -1.377535\H, 0, 4.195526, -0.004645, 1.325944\H, 0, 2.858944, 1.119931, 1.018183\H, 0, 5.273032, 2.091273, 1.831307\H, 0, 6.365506, 2.346946, -0.718513\H, 0, 7.786644, 0.349856, -0.278358\H, 0, 0.255461, -4.363847, -1.303181\H, 0, -1.798127, -2.394932, 1.153901\H, 0, -1.335818, -2.033184, 2.845198\H, 0, -1.563469, -3.707736, 2.336072\H, 0, -0.252482, -0.064036, -1.789216\H, 0, -1.340436, 0.436093, 1.026106\H, 0, -2.207744, 0.527235, -0.509731\H, 0, -0.739618, 2.691334, 0.867441\H, 0, 0.292015, 2.167716, -1.938263\H, 0, 2.383094, 3.120249, -1.210753\H, 0, 1.026643, 4.222765, -0.874864\H, 0, 7.700387, 1.47746, 1.10216\H, 0, 1.300558, -4.002093, 2.798432\H, 0, 3.881861, 5.942757, 0.801931\H, 0, 0.442976, -0.653799, 1.729614\0, 0, 2.173635, -1.342135, 1.138309\0, 0, 2.713022, -2.431599, 0.391255\0, 0, 6.588799, -0.275271, 1.308687\H, 0, 7.30785, -0.721934, 1.766624\p, 0, -3.176237, 3.377815, -0.365843\0, 0, -3.294339, 3.400247, 1.097996\0, 0, -3.544905, 4.710868, -1.162068\0, 0, -4.149348, 2.318122, -1.04539\C, 0, -3.945389, 1.782, -2.359481\H, 0, -2.884546, 1.556506, -2.505058\H, 0, -4.266707, 2.514287, -3.107744\C, 0, -4.770421, 0.514737, -2.447427\H, 0, -4.635493, 0.068383, -3.439617\0, 0, -4.317083, -0.385087, -1.441911\C, 0, -6.277075, 0.725046, -2.210111\C, 0, -5.413585, -0.818411, -0.644011\H, 0, -6.57166, 1.768474, -2.385036\C, 0, -6.446584, 0.300906, -0.755626\0, 0, -6.935847, -0.157489, -3.09712\H, 0, -5.804107, -1.767716, -1.014329\N, 0, -4.936977, -1.069125, 0.702489\H, 0, -6.188949, 1.126113, -0.086306\H, 0, -7.456694, -0.046662, -0.525792\H, 0, -7.882513, -0.123018, -2.919016\C, 0, -4.2771, -0.067807, 1.397525\C, 0, -5.118823, -2.340658, 1.240089\H, 0, -4.193796, 0.876223, 0.86676\C, 0, -3.758723, -0.228931, 2.629176\N, 0, -4.589075, -2.481816, 2.506984\0, 0, -5.694612, -3.242231, 0.66671\C, 0, -3.02484, 0.842898, 3.374552\C, 0, -3.911219, -1.532059, 3.279082\H, 0, -4.718145, -3.394622, 2.92625\H, 0, -3.010906, 1.774759, 2.804342\H, 0, -3.494339, 1.01999, 4.346044\H, 0, -1.99615, 0.52712, 3.584659\0, 0, -3.49072, -1.819424, 4.38205\H, 0, -3.233659, 5.508471, -0.714461\\Version=EM64L-G09 RevA.01\State=2-A\HF=-3833.1495715\S2=0.758487\S2-1=0.\S2A=0.750051\RM SD=1.591e-09\Dipole=0.7672643, 3.9956818, -1.70551\Quadrupole=61.0248057, -10.0798096, -50.9449961, -13.6239363, 21.7456977, -19.3964787\PG=C01 [X(C30H41N6O22P2)]\ \@
